RESEARCH ARTICLE

# Diffusion tensor imaging profiles reveal specific neural tract distortion in normal pressure hydrocephalus

Nicole C. Keong<sup>1,2\*</sup>, Alonso Pena<sup>3</sup>, Stephen J. Price<sup>2</sup>, Marek Czosnyka<sup>2</sup>, Zofia Czosnyka<sup>2</sup>, Elise E. DeVito<sup>4,5</sup>, Charlotte R. Housden<sup>4</sup>, Barbara J. Sahakian<sup>4</sup>, John D. Pickard<sup>2</sup>

**1** Department of Neurosurgery, National Neuroscience Institute and Duke-NUS Medical School, Singapore, Singapore, **2** Neurosurgical Division, Department of Clinical Neurosciences, University of Cambridge, Cambridge, United Kingdom, **3** SDA Bocconi School of Management, Milan, Italy, **4** Department of Psychiatry and MRC/ Wellcome Trust Behavioural and Clinical Neuroscience Institute, University of Cambridge, Cambridge, United Kingdom, **5** Department of Psychiatry, Yale University School of Medicine, New Haven, Connecticut, United States of America

\* [nchkeong@cantab.net](mailto:nchkeong@cantab.net)

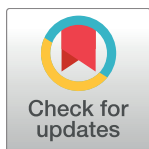

**OPEN ACCESS**

**Citation:** Keong NC, Pena A, Price SJ, Czosnyka M, Czosnyka Z, DeVito EE, et al. (2017) Diffusion tensor imaging profiles reveal specific neural tract distortion in normal pressure hydrocephalus. PLoS ONE 12(8): e0181624. <https://doi.org/10.1371/journal.pone.0181624>

**Editor:** Fernando de Castro, Instituto Cajal-CSIC, SPAIN

**Received:** June 7, 2016

**Accepted:** July 5, 2017

**Published:** August 17, 2017

**Copyright:** © 2017 Keong et al. This is an open access article distributed under the terms of the [Creative Commons Attribution License](https://creativecommons.org/licenses/by/4.0/), which permits unrestricted use, distribution, and reproduction in any medium, provided the original author and source are credited.

**Data Availability Statement:** All relevant data are in the paper.

**Funding:** Nicole C Keong was supported by a Joint Royal College of Surgeons of England and Dunhill Medical Trust Fellowship and a Tunku Abdul Rahman Centenary Grant and other from National Medical Research Council Transition Award Grant, Singapore (supporting ongoing work). A Medical Research Council Programme Grant [Wolfson Brain Imaging Centre Cooperative] supported the study imaging work. Marek Czosnyka was

## Abstract

### Background

The pathogenesis of normal pressure hydrocephalus (NPH) remains unclear which limits both early diagnosis and prognostication. The responsiveness to intervention of differing, complex and concurrent injury patterns on imaging have not been well-characterized. We used diffusion tensor imaging (DTI) to explore the topography and reversibility of white matter injury in NPH pre- and early after shunting.

### Methods

Twenty-five participants (sixteen NPH patients and nine healthy controls) underwent DTI, pre-operatively and at two weeks post-intervention in patients. We interrogated 40 datasets to generate a full panel of DTI measures and corroborated findings with plots of isotropy (p) vs. anisotropy (q).

### Results

Concurrent examination of DTI measures revealed distinct profiles for NPH patients vs. controls. PQ plots demonstrated that patterns of injury occupied discrete white matter districts. DTI profiles for different white matter tracts showed changes consistent with i) predominant transependymal diffusion with stretch/ compression, ii) oedema with or without stretch/ compression and iii) predominant stretch/ compression. Findings were specific to individual tracts and dependent upon their proximity to the ventricles. At two weeks post-intervention, there was a 6.7% drop in axial diffusivity ( $p = 0.022$ ) in the posterior limb of the internal capsule, compatible with improvement in stretch/ compression, that preceded any discernible changes in clinical outcome. On PQ plots, the trajectories of the posterior limb of the internal capsule and inferior longitudinal fasciculus suggested attempted 'round trips'. i.e. return to normality.

supported by grants from Johnson and Johnson – Codman, Integra, Sophysa and Aesculap. Zofia Czosnyka was supported by grants from Johnson and Johnson – Codman, Integra, Sophysa and Aesculap. Elise DeVito was funded by the Pinsent-Darwin Studentship in Mental Pathology. Charlotte Housden took up employment with Cambridge Cognition Ltd following her PhD. Barbara J Sahakian was supported by a Medical Research Council Grant and reports personal fees from Cambridge Cognition, Lundbeck, Servier, grants from Janssen/J&J, other from Otsuka and personal fees from Peak (Brainbow). JDP was supported by an NIHR Senior Investigator Award, a Medical Research Council Programme grant and an NIHR Cambridge Biomedical Research Centre grant [brain injury theme] and also wishes to declare the following - Past advisor to Codman and Medtronic international advisory board, Director (unpaid) of Medicam, Scientific Collaboration with GSK (unpaid), Trustee of Brain Research Trust, Patron of Headway Cambridgeshire, Honorary Director of National Institute for Health Research Brain Injury Healthcare Technology Cooperative. The funders had no role in study design, data collection and analysis, decision to publish, or preparation of the manuscript.

**Competing interests:** Zofia Czosnyka was supported by grants from Johnson and Johnson – Codman, Integra, Sophysa and Aesculap. Charlotte Housden took up employment with Cambridge Cognition Ltd following her PhD. Barbara J Sahakian reports personal fees from Cambridge Cognition, Lundbeck, Servier, grants from Janssen/J&J, other from Otsuka and personal fees from Peak (Brainbow). JDP: Past advisor to Codman and Medtronic international advisory board, Director (unpaid) of Medicam, Scientific Collaboration with GSK (unpaid), Patron of Headway Cambridgeshire. Marek Czosnyka was supported by grants from Johnson and Johnson – Codman, Integra, Sophysa and Aesculap. This does not alter our adherence to PLOS ONE policies on sharing data and materials.

## Conclusion

DTI profiling with p:q correlation may offer a non-invasive biomarker of the characteristics of potentially reversible white matter injury.

## Introduction

Normal pressure hydrocephalus (NPH) was first described in 1965 by Hakim and Adams as “symptomatic occult hydrocephalus with ‘normal’ cerebrospinal fluid (CSF) pressures” [1]. NPH classically comprises of a triad of gait disturbance, dementia and urinary incontinence associated with ventriculomegaly in the absence of persistently elevated intraventricular CSF pressures. NPH has a prevalence of 1–2% in the elderly population. It is important to identify patients with NPH because many of its clinical features may be reversed by the insertion of a CSF shunt. However, the clinical features of NPH are commonly encountered in aging or other neurodegenerative conditions so that many patients with a potentially reversible condition are misdiagnosed as having Alzheimer’s disease or vascular dementia and *vice versa* [2, 3].

The few published autopsy and biopsy studies of NPH patients have not revealed any specific neuropathological pattern for NPH. Cerebrovascular and neurodegenerative, including Alzheimer’s changes, are present in many NPH patients. Leptomeningeal fibrosis has been found but does not correlate with resistance to CSF outflow (Rcsf) [4]. The underlying pathophysiology of NPH remains unresolved, with key hypotheses suggesting structural or tissue distortion, reversal of CSF and interstitial fluid flow, failure of drainage of vasoactive metabolites, watershed ischaemia in the deep white matter, impairment of periventricular cerebral blood flow (CBF) autoregulation, and dysfunction of CSF circulation or hydrodynamics. Most NPH groups accept the likelihood that such theories of pathogenesis are not mutually exclusive and may represent different aspects of a complex ongoing process [5–7]. However, it is not clear which parts of the brain in NPH are involved with the gait disturbance, subcortical pattern of dementia and urgency of micturition.

Various MR techniques have been applied to NPH including magnetic resonance elastography (MRE) [8]. Diffusion Tensor Imaging (DTI) is able to interrogate tissue microstructure in the injured brain including traumatic brain injury and acute hydrocephalus [9–11]. Using DTI-derived mean diffusivity (MD) analysis, Ivkovic *et al.* found it possible to distinguish NPH from Alzheimer’s and Parkinson’s diseases as well as Lewy body dementia with a sensitivity of 86% and specificity of 96% [12]. However, DTI is capable of revealing more about white matter injury than MD alone as seen, for example, post-radiotherapy and head injury [10, 13]. Using fractional anisotropy, axial and radial eigenvalues, Hattori *et al.* demonstrated alterations in corticospinal tract microstructure sufficient to discriminate NPH from Alzheimer’s and Parkinson’s diseases, with a sensitivity of 94% and specificity of 80% [14]. Early work has demonstrated that such analyses may be used to characterize the topography and possible mechanism of injury to the white matter in NPH [15].

We hypothesized that, in NPH, differing patterns of white matter injury could be demonstrated to occur concurrently. Our study aimed to demonstrate the effects of surgical intervention on pre-operative patterns of injury and to evaluate the responsiveness of individual DTI patterns to CSF shunting. We used a full panel of DTI measures to interrogate both the microstructural effects of NPH on key white matter tracts likely to be ‘at-risk’ of damage. Published guidelines recommend the earliest assessment of clinical outcome scoring to be at 3-months post-intervention [16]. We examined patients at two weeks post-shunting, prior to expected

**Table 1. Clinical characteristics of patients.**

| Pt | Age | Sex | BCI  | Radiological abnormalities                                         | NPH symptoms                                                                     | Investigations                                                         |
|----|-----|-----|------|--------------------------------------------------------------------|----------------------------------------------------------------------------------|------------------------------------------------------------------------|
| 1  | 69  | M   | 0.26 | Hydrocephalus and PVL, atrophy, DWMH                               | Gait, memory, urinary incontinence                                               | Rcsf = 20.80 mmHg/ml/min                                               |
| 2  | 78  | F   | 0.26 | Hydrocephalus and PVL, no atrophy or DWMH                          | Predominant memory disturbance                                                   | Rcsf = 16.37 mmHg/ml/min                                               |
| 3  | 70  | F   | 0.40 | Hydrocephalus and PVL, DWMH                                        | Gait and balance disturbance, memory impairment, urinary incontinence            | Rcsf = 12.40 mmHg/ml/min                                               |
| 4  | 76  | M   | 0.26 | Hydrocephalus and PVL                                              | Gait and balance disturbance, memory impairment, urinary incontinence            | Lumbar drainage positive                                               |
| 5  | 78  | M   | 0.28 | Hydrocephalus and PVL, DWMH                                        | Gait and balance disturbance, mild memory impairment                             | Lumbar drainage positive, Rcsf via Ommaya reservoir = 10.51mmHg/ml/min |
| 6  | 72  | M   | 0.34 | Hydrocephalus and PVL                                              | Gait and balance problems, memory impairment                                     | Rcsf = 13.91 mmHg/ml/min                                               |
| 7  | 60  | M   | 0.30 | Hydrocephalus and PVL                                              | Predominant gait and balance problems, mild memory impairment, urinary frequency | Rcsf = 12.94 mmHg/ml/min                                               |
| 8  | 78  | M   | 0.26 | Hydrocephalus and PVL, atrophy, enlarged peri-Sylvian spaces, DWMH | Predominant gait and balance problems, mild memory impairment                    | Lumbar drainage positive                                               |
| 9  | 70  | F   | 0.29 | Hydrocephalus and PVL, No atrophy or DWMH                          | Predominant gait and balance disturbance, mild memory impairment                 | Rcsf = 20.02 mmHg/ml/min                                               |
| 10 | 78  | M   | 0.27 | Hydrocephalus and PVL, atrophy and DWMH                            | Gait and balance problems, memory impairment, urinary incontinence               | Rcsf = 13.80 mmHg/ml/min                                               |
| 11 | 82  | M   | 0.28 | Hydrocephalus and PVL, DWMH                                        | Gait and balance problems, memory disturbance and urinary incontinence           | Rcsf = 14.41 mmHg/ml/min                                               |
| 12 | 71  | M   | 0.32 | Hydrocephalus and PVL, no atrophy or DWMH                          | Gait and balance disturbance, urinary frequency, memory impairment               | Lumbar drainage positive                                               |
| 13 | 84  | F   | 0.26 | Hydrocephalus and PVL, atrophy, enlarged peri-Sylvian spaces, DWMH | Predominant gait and balance disturbance, mild memory impairment, nocturia       | Rcsf = 13.95 mmHg/ml/min                                               |
| 14 | 74  | F   | 0.32 | Hydrocephalus and PVL, DWMH                                        | Gait and balance disturbance, memory impairment, urinary incontinence            | Rcsf = 10.92 mmHg/ml/min                                               |
| 15 | 76  | M   | 0.26 | Hydrocephalus and PVL, DWMH and enlarged peri-Sylvian spaces       | Gait and balance disturbance, memory impairment, urinary incontinence            | Rcsf = 24.41 mmHg/ml/min                                               |
| 16 | 79  | F   | 0.31 | Hydrocephalus and PVL, DWMH, enlarged peri- Sylvian spaces         | Predominant gait and balance disturbance, memory impairment                      | Rcsf = 11.00 mmHg/ml/min                                               |

BCI = bicaudate index, DWMH = deep white matter hyperintensities, Pt = patient, PVL = periventricular lucency, Rcsf = resistance to cerebrospinal fluid outflow

<https://doi.org/10.1371/journal.pone.0181624.t001>

clinically discernible changes in improvement, in order to examine the pure effect of surgical intervention on diffusion tensor imaging profiles.

## Materials and methods

### Participants

We recruited sixteen patients with NPH (ten males and six females) ranging in age from 60 to 84 years (mean age of 75 years; [Table 1](#) for clinical characteristics of patients). The control group comprised of nine age-matched healthy controls (four males, five females; mean age of 70 years). The local Research Ethics Committee of the Cambridge Health Authority approved this study (LREC: 06/Q0108/330). Informed written consent was obtained from the patients and from the healthy controls, according to the Declaration of Helsinki. Informed written assent was obtained from patients' family members in cases of significant cognitive impairment. All patients were assessed in a multidisciplinary cerebrospinal fluid (CSF)

disorders clinic according to published NPH guidelines [17]. Ventriculomegaly was assessed using the bicaudate index (BCI); this is derived as the minimum intercaudate distance divided by the brain width along the same line. Significant ventriculomegaly is defined as a ratio of  $\geq 0.25$  using this method [18]. Supplementary testing included computerized CSF infusion studies (see Guidelines on supplemental testing in NPH [19]; our experience since 1992 is that an Rcsf of  $\geq 13$  mmHg/ml/min is significantly correlated to a favourable response following surgery, i.e. improvement in at least one clinical symptom [20]. Patients were assessed pre-operatively and at two weeks post-intervention (one patient did not attend post-operatively).

### Neuropsychological assessment

Patients were screened pre-operatively using neuropsychological assessments to assess mood and estimated pre-morbid IQ. The following measures were used as assessments of global function (Mini Mental State Examination (MMSE), learning and memory (Hopkins Verbal Learning Task-Revised (HVLt-R), verbal fluency and executive function (COWAT) [21–23]. As expected, cognitive impairment was demonstrated in the NPH group with means for MMSE, HVLt-R and COWAT of 24.13 (dementing range  $\leq 23$ ), 3.50 and 10.21 vs. the control group means of 28.57, 8.00 and 21.29 respectively [24, 25].

### MRI studies

MRI was performed on a 3T Siemens Tim Trio using a 12 channel head matrix radio frequency receive coil. We performed imaging pre-operatively and at two weeks post-operatively. Healthy controls underwent one MR scan. The MR imaging protocol included a T<sub>2</sub>-weighted sequence (fast spin echo pulse sequence was acquired with FOV 224mmx168mm, 5mm slice separation, giving a voxel size 0.7x0.7x5mm; TR = 4600ms, TE = 104ms), a fluid attenuated inversion recovery (FLAIR) sequence, (TR = 7840, TE = 95ms with an inversion time T<sub>1</sub> = 2500ms), a 3D volumetric T<sub>1</sub>-weighted (MPRAGE) acquisition (TR = 2300, TE = 2.98ms, with a resolution of 1x1x1mm). The DTI data set was acquired by using a spin echo diffusion-weighted echo planar imaging sequence with the following parameters: TR/TE, 8300ms/98ms, matrix dimensions 96x96, FOV 192x192, slice thickness 2mm giving a voxel size of 2x2x2mm. Diffusion weighted images were acquired in 12 non collinear directions each at 5 b-values of 350, 650, 1000, 1300 and 1600 s/mm<sup>2</sup>, along with 4 b=0 images.

### DTI post-processing

We analysed forty DTI datasets. We applied eddy current correction and DTI pre- and post-processing in the standard manner using the FDT diffusion toolbox in FSL analysis tools (FMRIB, Oxford, UK) [26–29]. We generated a full panel of DTI measures for each patient—fractional anisotropy (FA), mean diffusivity (MD) as well as Eigenvalues  $\lambda_1$ ,  $\lambda_2$  and  $\lambda_3$ .  $\lambda_1$  was taken to represent diffusivity along the axonal fibres, i.e. axial diffusivity ( $\lambda_{\parallel}$  or L1). The means of diffusivities perpendicular to the axonal fibres,  $\lambda_2$  and  $\lambda_3$ , represented radial diffusivity ( $\lambda_{\perp}$  or L2and3). Co-registration of the structural 3D volumetric image and DTI images was performed using SPM5 (University College London, London, UK) [30]. We re-sliced the MPRAGE image to match the DTI image space using the  $s_0$  volume (the b = 0 volume with optimal signal-to-noise ratio).

### Generation of regions-of-interest (ROIs) using the co-registered data sets

Co-registration and reproducibility of the MarsBaR methodology from the SPM5 toolbox have been previously published from our unit [10]. Prior to the study, we performed pilot work

**Table 2. Refinement of white matter tracts into an ‘at-risk’ model of injury in NPH.**

| ROI  | Grouping                | Relevance                         | Discussion                                                                                                                                                                                                                                                                                                                                                                                                                                                                                                                 |
|------|-------------------------|-----------------------------------|----------------------------------------------------------------------------------------------------------------------------------------------------------------------------------------------------------------------------------------------------------------------------------------------------------------------------------------------------------------------------------------------------------------------------------------------------------------------------------------------------------------------------|
| SLF  | Cognitive               | Excluded                          | Whilst spatial disorientation, for example, topographical deficits, is a feature of the NPH spectrum, language disorders are not typical. This tract, with its long anterior-posterior arrangement was initially explored but found to be too prone to valve artefact.                                                                                                                                                                                                                                                     |
|      | Spatial/ language       |                                   |                                                                                                                                                                                                                                                                                                                                                                                                                                                                                                                            |
| ILF  | Cognitive               | Included<br>P = lateral           | Cognitive dysfunction, such as inability to match visual recognition of common objects with the functional sequences required to use them, is a feature of the NPH spectrum. This tract was included for its relevance; its long anterior-posterior arrangement adjacent to the ventricles. Its inferior position in relation to the SLF protected this tract from issues related to valve artefact.                                                                                                                       |
|      | Visual recognition      |                                   |                                                                                                                                                                                                                                                                                                                                                                                                                                                                                                                            |
| IFO  | Cognitive               | Included<br>P = relatively remote | Whilst language disorders are not typical of the NPH spectrum, the long anterior-posterior arrangement of this tract and its fronto-basal position provided relevance to the frontal executive dysfunction seen in NPH. This tract was included but only specifically at the fronto-temporal point, i.e. the area of most likely distortion due to expansion of the frontal horns (combined with the UNC).                                                                                                                 |
|      | Language                |                                   |                                                                                                                                                                                                                                                                                                                                                                                                                                                                                                                            |
| UNC  | Cognitive               | Included<br>P = relatively remote | The fronto-temporal arrangement of this tract and its participation in the limbic pathway provided relevance to the frontal executive dysfunction seen in NPH. This tract was included at the area of most likely distortion due to expansion of the frontal horns, i.e. at its point of curvature. Due to considerations of crossing fibres and the relatively reduced white matter fibre bundle sizes seen in NPH, this ROI was combined with the adjacent IFO tract at this point for purposes of enhanced consistency. |
|      | Ventral limbic          |                                   |                                                                                                                                                                                                                                                                                                                                                                                                                                                                                                                            |
| CING | Cognitive               | Excluded                          | The relationship of this tract to the ventricles and its participation in the limbic pathway provided relevance to the frontal executive dysfunction seen in NPH. However, the relatively large amount of surrounding CSF represented in the ROI for the cingulum bundle rendered the interpretation of this tract difficult using this methodology, and resulted in its exclusion.                                                                                                                                        |
|      | Dorsal limbic           |                                   |                                                                                                                                                                                                                                                                                                                                                                                                                                                                                                                            |
| GCC  | Motor                   | Included<br>P = adjacent          | The close relationship with this tract to the ventricles and its participation in the motor pathway provided a clear relevance to the gait and balance apraxia seen in NPH. This part of the corpus callosum was included for its anterior/ frontal location.                                                                                                                                                                                                                                                              |
|      | Contralateral executive |                                   |                                                                                                                                                                                                                                                                                                                                                                                                                                                                                                                            |
| BCC  | Motor                   | Included<br>P = adjacent          | The close relationship with this tract to the ventricles and its participation in the motor pathway provided a clear relevance to the gait and balance apraxia seen in NPH. This part of the corpus callosum was included for its midpoint location between the two ventricles and its role in a potential hydrocephalic disconnection syndrome.                                                                                                                                                                           |
|      | Contralateral executive |                                   |                                                                                                                                                                                                                                                                                                                                                                                                                                                                                                                            |
| SCC  | Motor                   | Excluded                          | The close relationship with this tract to the ventricles and its participation in the motor pathway provided a clear relevance to the gait and balance apraxia seen in NPH. However, the GCC and BCC were deemed to be the stronger and more relevant ROIs.                                                                                                                                                                                                                                                                |
|      | Contralateral executive |                                   |                                                                                                                                                                                                                                                                                                                                                                                                                                                                                                                            |
| ALIC | Cognitive               | Excluded                          | Behavioural syndromes are possible in, but not typical of, NPH. The PLIC tract was also deemed to be far superior as a ROI in both functional and neuroanatomical considerations.                                                                                                                                                                                                                                                                                                                                          |
|      | Behaviour               |                                   |                                                                                                                                                                                                                                                                                                                                                                                                                                                                                                                            |
| ATR  | Cognitive               | Included<br>P = lateral           | This thalamocortical fibre pathway is found in the medial portion of the ALIC. However, its prefrontal cortical projections provide more relevance than ALIC to the likely areas of distortion due to the expansion of the frontal horns. This tract has been implicated both in poor cognitive performance in vascular dementia and psychopathology, such as schizophrenia, and was therefore included.                                                                                                                   |
|      | Behaviour               |                                   |                                                                                                                                                                                                                                                                                                                                                                                                                                                                                                                            |
| GIC  | Sensory                 | Excluded                          | Sensory syndromes are not typical of NPH. The PLIC tract was deemed far superior as a ROI.                                                                                                                                                                                                                                                                                                                                                                                                                                 |
| PLIC | Motor                   | Included                          | The key role of the corticospinal tract in gait and balance dysfunction provided a clear relevance to NPH. In addition, the superior-inferior arrangement of this tract, relatively remote to the ventricles, provided a good comparator to other relevant tracts that were adjacent and lateral to the ventricles.                                                                                                                                                                                                        |
|      |                         | P = relatively remote             |                                                                                                                                                                                                                                                                                                                                                                                                                                                                                                                            |

SLF = superior longitudinal fasciculus, ILF, inferior longitudinal fasciculus, IFO = inferior fronto-occipital fasciculus, UNC = uncinate fasciculus, CING = cingulum, GCC = genu of the corpus callosum, BCC = body of the corpus callosum, SCC = splenium of the corpus callosum, ALIC = anterior limb of the internal capsule, GIC = genu of the internal capsule, PLIC = posterior limb of the internal capsule, P = position in relation to lateral ventricles

<https://doi.org/10.1371/journal.pone.0181624.t002>

using seventy-four white matter ROIs to refine the technique for NPH, accounting for significant ventriculomegaly and surgical considerations. We used a DTI-based white matter tract atlas for anatomical identification of key fibre bundles on the structural 3D volumetric image [31]. Exclusions were performed for a variety of reasons, including relevance of tracts to NPH pathophysiology, technical consistency of ROI results, and proximity or impact from shunt/ valve artefacts on post-operative imaging (Table 2). We refined the pilot ROIs into an ‘at-risk’ model of white matter injury in NPH comprising six white matter tracts (Fig 1)—the genu and body of the corpus callosum (GCC and BCC), inferior longitudinal fasciculus (ILF), anterior

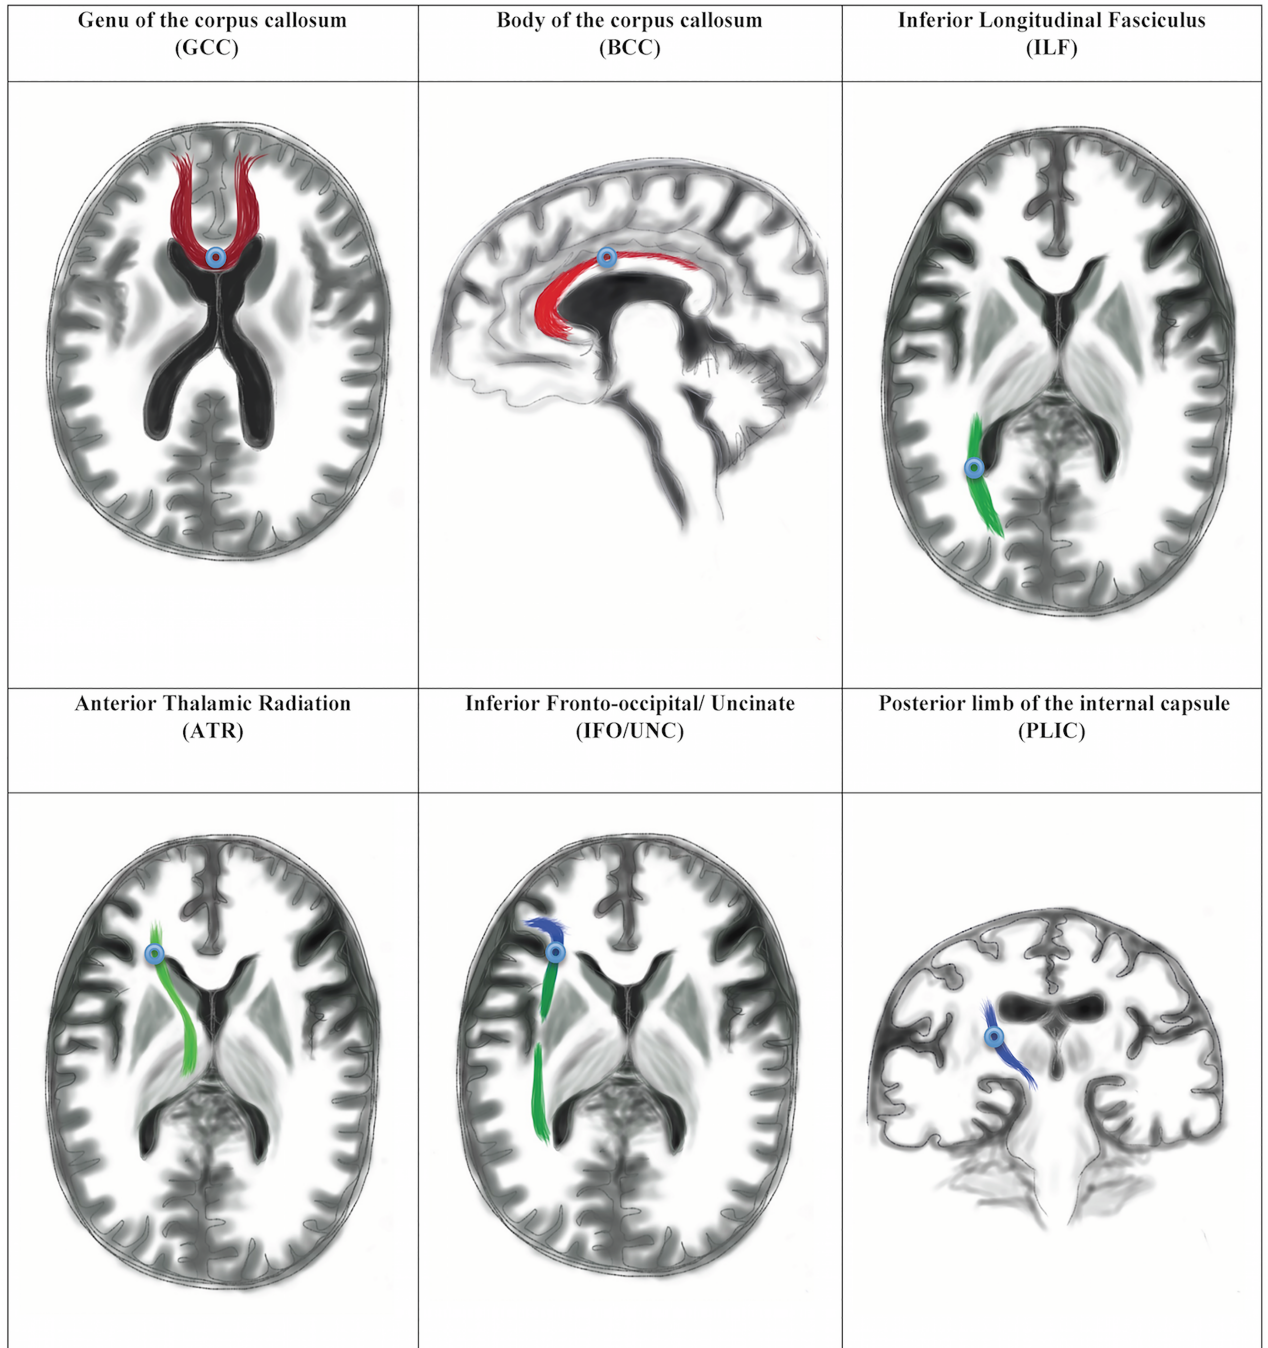

**Fig 1. Illustration of white matter regions of interest (ROIs).** White matter tracts represented in the context of normal ventricular size for clarity.

<https://doi.org/10.1371/journal.pone.0181624.g001>

thalamic radiation (ATR), the junction of the inferior fronto-occipital/uncinate fasciculi (IFO/UNC) and posterior limb of the internal capsule (PLIC). The final ROIs chosen demonstrated no significant differences in DTI parameters due to shunt/valve artefact on pilot testing. These six ROIs were also deemed highly relevant to NPH neuroanatomy. We found a 113 mm<sup>3</sup> spherical MarsBaR (3mm radius) to be the optimal ROI with maximal white matter and

minimal CSF/ extra-axonal sampling. We believe such a refined target avoids the limitations associated with spatial normalization.

ROIs were exported to Image J (National Institutes of Health, Bethesda, USA) and applied to all DTI output files [32]. We visually inspected ROI placements on each DTI output file for quality of co-registration. Right and left ROIs were analyzed separately and the means calculated for each ROI; no significant differences were found between right and left on pilot data. The same operator (N.K.) generated all ROIs for consistency. Reliability measures were performed using ROI methodology on a training dataset of ten patients with NPH. Intraclass correlation coefficients (ICCs) generated using FA and MD measures for the GCC, BCC and PLIC ranged from 0.811 to 0.998 (intra-rater) and 0.802 to 0.995 (inter-rater) with the use of strict pre-determined neuroanatomical landmarks. We further tested the training dataset for reliability against an independent graphical software toolbox to account for variability in techniques described in the literature [33]. ICCs generated using FA and MD measures for GCC and BCC ROIs ranged from 0.941 to 0.995 using ImageJ vs. ExploreDTI [34], suggesting that results from ROI methodology were reproducible across different preferred software tools.

## Statistical analysis and DTI profiles

Descriptive statistical analysis was performed using the SPSS 15.0 (SPSS Software Products, Chicago, USA). Independent-samples *t*-tests (two-tailed) were performed for patients compared to controls and paired-samples *t*-tests (two-sided) for pre-operative compared to post-operative patients. Results were deemed to be significant at a value of  $p < 0.05$  on the Student's *t*-test. We considered each white matter tract independently of each other; only two groups were compared in each experiment. Multivariate ANOVA-type analyses of DTI measures were not performed; ROI sets for each pairing were directly compared for the analysis of directional information and proportional magnitude of changes in order to generate DTI profiles; Bonferroni corrections were therefore not deemed appropriate in this study. We performed comparison of means and the percentage differences of changes in fractional anisotropy as well as mean, axial and radial diffusivities. By correlating significant findings with the simultaneous examination of the direction and magnitude of changes across the full panel of DTI measures, we determined predominant patterns of injury. Interpretation of DTI measures was determined *a priori* and derived from work published in human and animal studies (see [Discussion](#)). DTI patterns were further interrogated using published p:q tensor decomposition methodology for consistency [35].

## The p:q tensor transformation

We have previously introduced p:q tensor transformation for the analysis of MR DTI images in Pena *et al* [35]. This technique is based on the classical decomposition of the diffusion tensor into its isotropic and anisotropic components, as already observed by Basser and Pierpaoli *et al* [28, 36]. Our contribution was to construct a graphical representation of the diffusion tensor based on this decomposition that would facilitate the analysis and visualization of large datasets of region of interest (ROI) and voxel-based (VB) imaging data. The p:q tensor decomposition enhances the visualization and quantification of MR DTI data in both normal and pathological conditions. In particular, it is an aid to simultaneously visualize seven scalar tensor measures; we showed this in the case of a normal volunteer, a stroke patient and a hydrocephalus patient.

The first step in the p:q tensor transformation is to decompose the diffusion tensor  $D$  into two tensors  $P$  and  $Q$  according to the next equation:

$$D_{ij} = \underbrace{DI_{ij}}_{P_{ij}} + \underbrace{[D_{ij} - DI_{ij}]}_{Q_{ij}}$$

Here  $I$  is the identity tensor

$$I_{ij} = \text{diag}(1, 1, 1)$$

The first term on the right hand side is the isotropic tensor (denoted tensor  $P$ ), while the second term in brackets represents the deviatoric tensor (denoted tensor  $Q$ ). The magnitude of these tensors can be quantified by its scalar isotropic ( $p$ ) and anisotropic ( $q$ ) components. The values of  $p$  and  $q$  can be computed as:

$$p = \sqrt{3}D$$

$$q = \sqrt{(\lambda_1 - D)^2 + (\lambda_2 - D)^2 + (\lambda_3 - D)^2}$$

Here  $D$  is the mean diffusion and the lambdas are the eigenvalues of the diffusion tensor. According to these definitions,  $p$  is therefore a scaled measure of the mean diffusion in the tensor, while  $q$  is a measure of the variance or deviation of the eigenvalues with respect to the mean diffusion of the tensor.

The second step is to plot each tensor as a point in a Cartesian plane with  $p$  taken as the x-axis and  $q$  as the y-axis. This plane will be denoted as the p:q plane. The effect of this transformation is to reduce the dimensionality of the tensor from six dimensions to two.

The third step is to use the p:q plane to deduce the five additional tensor scalar measures:  $D$ ,  $RA$ ,  $FA$ ,  $L$  and  $\phi$ . Four of these seven tensor measures ( $q$ ,  $RA$ ,  $FA$ ,  $\phi$ ) are anisotropy measures, while  $D$  and  $p$  are measures of the magnitude of diffusion and  $L$  is a measure of the total diffusion of the tensor.  $D$ ,  $p$ ,  $q$  and  $L$  have units of  $\times 10^{-4}$  mm<sup>2</sup>/s,  $RA$  and  $FA$  are dimensionless, and  $\phi$  has units of degrees.

These scalar measures can be deduced either analytically or graphically. The analytical method is to directly compute the measures based on the  $p$ ,  $q$  components using the formulae:

$$L = \sqrt{p^2 + q^2}$$

$$RA = \frac{q}{p}$$

$$FA = \sqrt{\frac{3}{2}} \frac{q}{L}$$

$$\phi = \tan^{-1} \left( \frac{q}{p} \right)$$

In previous work, we highlighted the potential pitfalls of using  $FA$  and  $RA$  as sole means of MR DTI analysis and the advantage of visually representing seven scalar measures simultaneously. The p:q tensor transformation has since been used in various clinical settings to quantify the diffusion and anisotropy in various tissues, thereby gaining information about their internal architecture. Srinivasan *et al.* have recently used it to distinguish intracranial epidermoids from normal white matter in the splenium of the corpus callosum [37]. In this study, we first examined concurrent changes in both magnitude and direction across the full panel of



**Table 3. Pre-operative vs. early post-operative NPH patients and Healthy controls (HC)—mean (SD), *t*-tests: FA and MD measures.**

| DTI measure                                     | Status                            | GCC                 | BCC                 | ILF                 | ATR                 | IFO/UNC             | PLIC                |
|-------------------------------------------------|-----------------------------------|---------------------|---------------------|---------------------|---------------------|---------------------|---------------------|
| FA<br>( $\times 10^{-4} \text{mm}^2/\text{s}$ ) | Pre-op patients                   | 0.602 (0.128)       | 0.478 (0.097)       | 0.545 (0.051)       | 0.380 (0.060)       | 0.403 (0.059)       | 0.751 (0.034)       |
|                                                 | Post-op patients                  | 0.571 (0.143)       | 0.470 (0.071)       | 0.519 (0.069)       | 0.383 (0.045)       | 0.421 (0.068)       | 0.682 (0.066)       |
|                                                 | Healthy controls (HC)             | 0.768 (0.023)       | 0.612 (0.090)       | 0.575 (0.070)       | 0.452 (0.046)       | 0.399 (0.048)       | 0.713 (0.064)       |
|                                                 | Pre-op vs. HC (% difference)      | -21.6               | -21.9               | -5.2                | -15.9               | +1.0                | +5.3                |
|                                                 | ( <i>p</i> value)                 | ( <i>p</i> = 0.001) | ( <i>p</i> = 0.003) | ( <i>p</i> = 0.231) | ( <i>p</i> = 0.005) | ( <i>p</i> = 0.863) | ( <i>p</i> = 0.064) |
|                                                 | Post-op vs. Pre-op (% difference) | -5.1                | -1.7                | -4.8                | +0.8                | +4.5                | -9.2                |
|                                                 | ( <i>p</i> value)                 | ( <i>p</i> = 0.519) | ( <i>p</i> = 0.798) | ( <i>p</i> = 0.245) | ( <i>p</i> = 0.887) | ( <i>p</i> = 0.432) | ( <i>p</i> = 0.001) |
|                                                 | Post-op vs. HC (% difference)     | -25.7               | -23.2               | -9.7                | -15.3               | +5.5                | -4.3                |
| ( <i>p</i> value)                               | ( <i>p</i> = 0.001)               | ( <i>p</i> = 0.000) | ( <i>p</i> = 0.071) | ( <i>p</i> = 0.001) | ( <i>p</i> = 0.395) | ( <i>p</i> = 0.280) |                     |
| MD<br>( $\times 10^{-4} \text{mm}^2/\text{s}$ ) | Pre-op patients                   | 8.295 (1.569)       | 9.348 (1.454)       | 7.807 (0.692)       | 7.045 (0.360)       | 7.140 (0.421)       | 5.879 (0.440)       |
|                                                 | Post-op patients                  | 8.226 (1.847)       | 10.347 (1.353)      | 7.662 (0.586)       | 7.220 (0.939)       | 7.000 (0.393)       | 5.899 (0.423)       |
|                                                 | Healthy controls (HC)             | 6.196 (0.341)       | 7.416 (1.078)       | 6.610 (1.143)       | 6.633 (0.558)       | 6.550 (0.380)       | 5.350 (0.299)       |
|                                                 | Pre-op vs. HC (% difference)      | +33.9               | +26.1               | +18.1               | +6.2                | +9.0                | +9.9                |
|                                                 | ( <i>p</i> value)                 | ( <i>p</i> = 0.001) | ( <i>p</i> = 0.002) | ( <i>p</i> = 0.003) | ( <i>p</i> = 0.034) | ( <i>p</i> = 0.002) | ( <i>p</i> = 0.004) |
|                                                 | Post-op vs. Pre-op (% difference) | -0.8                | +10.7               | -1.9                | +2.5                | -2.0                | +0.3                |
|                                                 | ( <i>p</i> value)                 | ( <i>p</i> = 0.911) | ( <i>p</i> = 0.058) | ( <i>p</i> = 0.536) | ( <i>p</i> = 0.493) | ( <i>p</i> = 0.348) | ( <i>p</i> = 0.897) |
|                                                 | Post-op vs. HC (% difference)     | +32.8               | +39.5               | +15.9               | +8.8                | +6.9                | +10.3               |
| ( <i>p</i> value)                               | ( <i>p</i> = 0.004)               | ( <i>p</i> = 0.000) | ( <i>p</i> = 0.007) | ( <i>p</i> = 0.104) | ( <i>p</i> = 0.012) | ( <i>p</i> = 0.003) |                     |

Shading in grey illustrates differences in white matter injury patterns were significant.

<https://doi.org/10.1371/journal.pone.0181624.t003>

DTI measures, and interpreted them; we further corroborated this graphically by using PQ plots. In addition, we tested the interpretation of trends by comparing changes seen to mechanical stretch curves, as per Ateshian and Weiss [38], which generated predictions for theoretical directions of change in the context of decompression.

### Role of the funding source

The sponsors of the study had no role in study design, data collection, data analysis, data interpretation, or writing of the report. All authors had full access to all the data in the study and responsibility for the decision to submit for publication.

## Results

### Imaging analysis

**Pre-operative NPH patients vs. healthy age-matched controls (Tables 3 and 4).** In NPH patients compared to controls, there was an increase in MD in all tracts with the greatest change in the corpus callosum (genu +33.9%, *p* = 0.001; and body +26.1%, *p* = 0.002; Table 3). This large increase in MD in the corpus callosum was accompanied by a decrease in FA (-21.6%, *p* = 0.001 and -21.9%, *p* = 0.003 respectively; Table 3) due to a large increase in radial diffusivity, L2and3, (+92.7%, *p* = 0.002 and +48.3%, *p* = 0.002; Table 4) despite smaller but significant increases in axial diffusivity, L1, (+21.9, *p* = 0.017 and +10.4%, *p* = 0.029; Table 4). All these changes were significant.

The inferior longitudinal fasciculus, anterior thalamic radiation and inferior fronto-occipital/uncinate fasciculi demonstrated similar but less marked changes. In contrast, the increase in axial diffusivity in the posterior limb of the internal capsule was sufficiently large (+27.9%;

**Table 4. Pre-operative vs. early post-operative NPH patients and Healthy controls (HC)—mean (SD), *t*-tests: Axial, radial diffusivities.**

| DTI measure                            | Status                            | GCC                 | BCC                 | ILF                 | ATR                 | IFO/UNC             | PLIC                |
|----------------------------------------|-----------------------------------|---------------------|---------------------|---------------------|---------------------|---------------------|---------------------|
| L1                                     | Pre-op patients                   | 14.570 (1.058)      | 14.430 (1.503)      | 13.040 (1.377)      | 10.042 (0.566)      | 10.430 (0.789)      | 12.377 (1.011)      |
|                                        | Post-op patients                  | 14.110 (2.134)      | 15.548 (1.421)      | 12.512 (1.140)      | 10.290 (1.209)      | 10.375 (0.767)      | 11.550 (0.870)      |
|                                        | Healthy controls                  | 11.949 (3.875)      | 13.072 (1.191)      | 11.302 (1.688)      | 10.214 (0.909)      | 9.499 (0.569)       | 9.677 (3.398)       |
|                                        | Pre-op vs. HC (% difference)      | +21.9               | +10.4               | +15.4               | -1.7                | +9.8                | +27.9               |
| (x10 <sup>-4</sup> mm <sup>2</sup> /s) | ( <i>p</i> value)                 | ( <i>p</i> = 0.017) | ( <i>p</i> = 0.029) | ( <i>p</i> = 0.010) | ( <i>p</i> = 0.564) | ( <i>p</i> = 0.005) | ( <i>p</i> = 0.006) |
|                                        | Post-op vs. Pre-op (% difference) | -3.2                | +7.7                | -4.0                | +2.5                | -0.5                | -6.7                |
|                                        | ( <i>p</i> value)                 | ( <i>p</i> = 0.431) | ( <i>p</i> = 0.027) | ( <i>p</i> = 0.253) | ( <i>p</i> = 0.474) | ( <i>p</i> = 0.929) | ( <i>p</i> = 0.022) |
|                                        | Post-op vs. HC (% difference)     | +18.1               | +18.9               | +10.7               | +0.7                | +9.2                | +19.4               |
| L2and3                                 | Pre-op patients                   | 5.158 (2.047)       | 6.807 (1.671)       | 5.191 (0.547)       | 5.547 (0.500)       | 5.358 (0.738)       | 3.255 (2.013)       |
|                                        | Post-op patients                  | 5.530 (2.113)       | 8.363 (3.143)       | 5.643 (1.893)       | 6.071 (1.758)       | 5.744 (2.033)       | 4.395 (2.923)       |
|                                        | Healthy controls (HC)             | 2.677 (0.239)       | 4.589 (1.291)       | 4.264 (0.949)       | 4.843 (0.497)       | 5.075 (0.425)       | 2.621 (0.386)       |
|                                        | Pre-op vs. HC (% difference)      | +92.7               | +48.3               | +21.7               | +14.5               | +5.6                | +24.2               |
| (x10 <sup>-4</sup> mm <sup>2</sup> /s) | ( <i>p</i> value)                 | ( <i>p</i> = 0.002) | ( <i>p</i> = 0.002) | ( <i>p</i> = 0.005) | ( <i>p</i> = 0.003) | ( <i>p</i> = 0.306) | ( <i>p</i> = 0.392) |
|                                        | Post-op vs. Pre-op (% difference) | +7.2                | +22.9               | +8.7                | +9.4                | +7.2                | +35.0               |
|                                        | ( <i>p</i> value)                 | ( <i>p</i> = 0.622) | ( <i>p</i> = 0.093) | ( <i>p</i> = 0.367) | ( <i>p</i> = 0.262) | ( <i>p</i> = 0.482) | ( <i>p</i> = 0.213) |
|                                        | Post-op vs. HC (% difference)     | +106.6              | +82.2               | +32.3               | +25.4               | +13.2               | +67.7               |
|                                        | ( <i>p</i> value)                 | ( <i>p</i> = 0.001) | ( <i>p</i> = 0.003) | ( <i>p</i> = 0.055) | ( <i>p</i> = 0.055) | ( <i>p</i> = 0.345) | ( <i>p</i> = 0.106) |

Shading in grey indicates that differences in white matter injury patterns were significant.

<https://doi.org/10.1371/journal.pone.0181624.t004>

*p* = 0.006) to result in a small increase, not a decrease, in FA (+5.3%; *p* = 0.064) despite an increase in radial diffusivity (+24.2%; *p* = 0.392).

In summary, significant differences were found in the DTI profiles of pre-operative patients compared to healthy controls (Fig 2). Mean, axial and radial diffusivities all increased but to different degrees between tracts and with varying contributions to FA. White matter immediately adjacent to the ventricles (corpus callosum) had the greatest increase in radial diffusivity and reduction in FA. The greatest increase in axial diffusivity was in the posterior limb of the internal capsule. Analysis using *p*:*q* methodology confirmed that there was an increase in isotropy (*p*) in all white matter tracts, the magnitude of which depended on the distance from the ventricles; the corpus callosum demonstrated the biggest change in *p* compared to the posterior limb of the internal capsule, which demonstrated the least increase (Fig 3). There was an increase in anisotropy (*q*) in the posterior limb of the internal capsule, inferior longitudinal fasciculus and inferior fronto-occipital/uncinate fasciculi, but a decrease in anisotropy in the corpus callosum and the anterior thalamic radiation.

Red shading designates percentage differences (%) between pre-operative NPH patients vs. healthy controls. Blue shading designates percentage differences (%) between post-operative NPH patients vs. healthy controls.

Interpretation of pre-operative white matter injury patterns—i) Genu of the corpus callosum—the increase in radial diffusivity (L2and3) is > 4 times that of axial diffusivity (L1), although both the L1 and MD are increased. This is consistent with “predominant transependymal diffusion with stretch/compression”; profiles for the body of the corpus callosum were similar, ii) Inferior longitudinal fasciculus—there is an increase in L1 but this change is proportionally lower than the increases in MD and radial diffusivity (L2and3, 1.5 times predominant). This is consistent with “stretch/oedema”; and iii) Posterior limb of the internal capsule—the increase in L1 is predominant (2.8 times that of MD, modest increase in radial

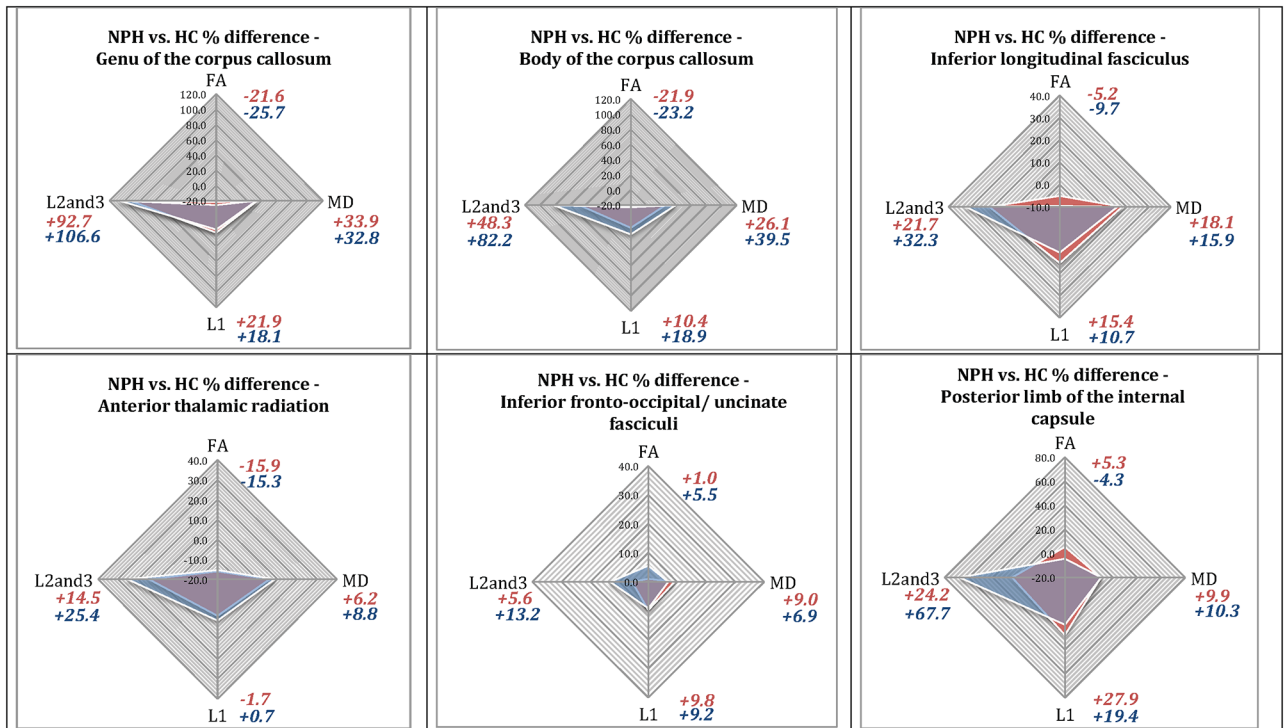

**Fig 2. DTI profiles in pre-operative and post-operative NPH patients vs. healthy controls (in percentage difference (%)).** Illustration of DTI profiles—Four measures comprising the full panel for DTI interpretation, (FA, MD, L1 and L2and3), are visually represented as radar graphs. Differences in measures may be viewed concurrently; each axis is scalar and dimensionally comparable. The morphology of the graph, i.e. the shape of the radar web, is dependent upon i) the degree of differences between the two groups compared (the larger the differences, the bigger the area of the radar web) and ii) the DTI measure predominantly affected (the radar web points towards the DTI measure with the highest percentage difference between the groups).

<https://doi.org/10.1371/journal.pone.0181624.g002>

diffusivity) and there is no reduction of FA. This is consistent with “predominant stretch/compression”. Using the same methodology, the inferior fronto-occipital/uncinate fasciculi demonstrated “stretch/oedema” but the anterior thalamic radiation had oedema without stretch (no increase in L1). The overlay of post-operative and pre-operative DTI profiles illustrate changes in NPH patients vs. healthy controls at two weeks post-intervention. Significant changes were demonstrated in the posterior limb of the internal capsule (FA and L1).

**Early changes post-surgical intervention (Tables 3 and 4).** Clinically, all patients in the study returned to baseline at two weeks post-intervention with no significant post-operative complications. Patients underwent routine post-operative functional optimization including clinical scanning and shunt valve adjustment; there were no significant changes in gait measures or outcomes at this stage, as confirmed by expectations from recommended guidelines [16]. DTI profiles in NPH patients still differed post-operatively from healthy controls (Fig 2). There was no significant change in mean diffusivity in any of the tracts examined. Significant reductions were seen in both axial diffusivity (-6.7%;  $p = 0.022$ ) and FA (-9.2%;  $p = 0.010$ ) in the posterior limb of the internal capsule, together with a trend towards an increase in radial diffusivity (+35.0%;  $p = 0.213$ ). The post-operative FA was now less than healthy controls. The only other significant change was an increase in axial diffusivity in the body of the corpus callosum (+7.7%;  $p = 0.027$ ). On p:q examination, there were sharp decreases in anisotropy (q) in the genu of the corpus callosum, inferior longitudinal fasciculus and the posterior limb of the internal capsule (Fig 3). Changes seen in the inferior fronto-

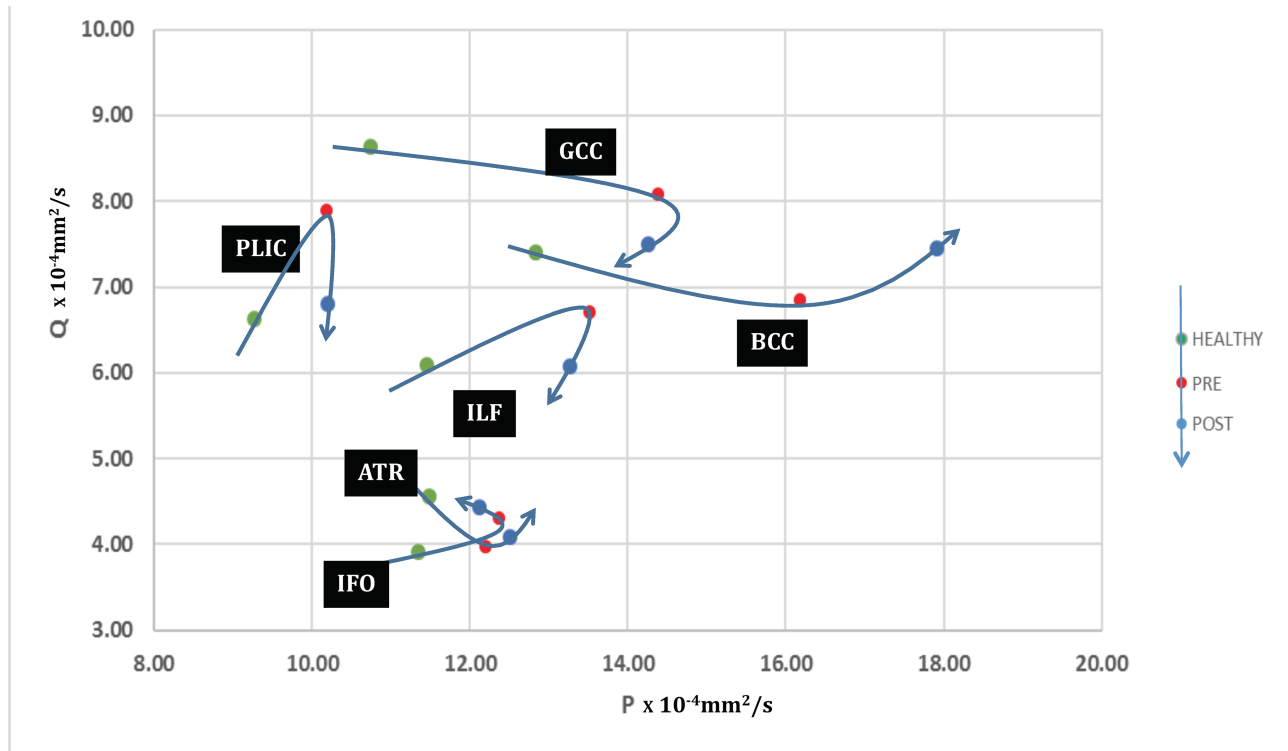

**Fig 3. PQ plots of pre-operative and post-operative NPH patients compared to healthy controls.** The effect of shunting in NPH patients. Trajectories of six brain ROIs in the p:q plane, illustrating their evolution from control (HEALTHY), to hydrocephalus pre-shunting (PRE) and two weeks after shunting (POST). A round trip would represent that the ROIs have completed a return journey to normal diffusion levels.

<https://doi.org/10.1371/journal.pone.0181624.g003>

occipital/uncinate fasciculi and anterior thalamic radiation were small. Both isotropy and anisotropy increased in the body of the corpus callosum. Overall, only the trajectories of the posterior limb of the internal capsule and inferior longitudinal fasciculus suggested attempts at ‘round trips’, i.e. a return to normality.

## Discussion

### DTI findings of pre-operative NPH patients compared to healthy controls and changes at two weeks following shunting

Our study has shown that, compared to healthy controls, NPH patients exhibited distinct profiles of white matter injury. These profiles can be entirely described by changes in anisotropic indices that are specific to the individual tracts. The most consistent finding, in the six white matter tracts examined in NPH, was widespread increases in mean diffusivity. Superimposed on this general increase in white matter mean diffusivity are tract-specific changes that appear to correlate with both the proximity of the tracts to the lateral ventricles as well as to their directionality. For consistency, we interpreted the white matter injury patterns in this study both in the context of established DTI findings of ‘pure’ models of white matter damage as well as known imaging findings in hydrocephalus (Table 5).

In addition, we further performed p:q analysis on the DTI measures; by decomposing them into their quantitative scalar components, it was possible to generate plots of isotropy (p) vs. anisotropy (q), that were not dependent upon prior knowledge of those profiles. When p, q

**Table 5. Pathophysiological basis for DTI interpretation in NPH (see Discussion for references; eq denotes equivocal findings in literature).**

| Pathological conditions                                                                                                  | FA          | MD        | L1       | L2and3   | Interpretation                                                                                                                                                         | Pathophysiology and relevance to NPH                                                                                                                                                                                                                                                                                                                                                                                                                                                                                                                                        |
|--------------------------------------------------------------------------------------------------------------------------|-------------|-----------|----------|----------|------------------------------------------------------------------------------------------------------------------------------------------------------------------------|-----------------------------------------------------------------------------------------------------------------------------------------------------------------------------------------------------------------------------------------------------------------------------------------------------------------------------------------------------------------------------------------------------------------------------------------------------------------------------------------------------------------------------------------------------------------------------|
| A broad range of neurological conditions                                                                                 | Low         | eq        | eq       | eq       | Reductions in FA are more common; increases in FA are more rarely observed                                                                                             | FA is dependent on the magnitude of changes in axial and radial diffusivities                                                                                                                                                                                                                                                                                                                                                                                                                                                                                               |
| Aging, leukoaraiosis                                                                                                     | eq          | High      | eq       | eq       | Small increase in periventricular MD in normal ageing                                                                                                                  | Age-matched healthy controls are important for the study of NPH                                                                                                                                                                                                                                                                                                                                                                                                                                                                                                             |
| Demyelination                                                                                                            | eq          | eq        | eq       | High     | Myelin increases the orderliness of white matter fibre tracts                                                                                                          | Increased orderliness of tracts is characterized by increased axial, reduced radial diffusivities                                                                                                                                                                                                                                                                                                                                                                                                                                                                           |
| Remyelination                                                                                                            | eq          | eq        | High     | Low      |                                                                                                                                                                        |                                                                                                                                                                                                                                                                                                                                                                                                                                                                                                                                                                             |
| Axonal loss                                                                                                              | Low         | High      | Low      | High     | Changes in FA, MD and axial are features of axonal loss                                                                                                                | These changes are likely to be irreversible, demyelination increases radial diffusivity                                                                                                                                                                                                                                                                                                                                                                                                                                                                                     |
| Vasogenic oedema                                                                                                         | Low         | High      | eq       | eq       | Pure changes in vasogenic oedema do not result in significant differences in diffusivities                                                                             | Oedema produces changes sufficient to impact upon FA and MD                                                                                                                                                                                                                                                                                                                                                                                                                                                                                                                 |
| Carpal tunnel syndrome, cervical spondylotic myelopathy                                                                  | Low         | High      | Low      | High     | Pure compression in fixed compartments produces a situation without the possibility of stretch                                                                         | Compression without stretch conversely increases tract tortuosity due to impaction                                                                                                                                                                                                                                                                                                                                                                                                                                                                                          |
| Displacement around tumours                                                                                              | High        | eq        | High     | Low      | Distortion due to space-occupying lesions                                                                                                                              | Stretch without compression, no impact on MD                                                                                                                                                                                                                                                                                                                                                                                                                                                                                                                                |
| Obstructive, paediatric hydrocephalus                                                                                    | eq          | High      | High     | eq       | Restricted to periventricular tissues, tend to resolve after CSF diversion                                                                                             | Probably the result of reversal of CSF flow through the ependymal lining                                                                                                                                                                                                                                                                                                                                                                                                                                                                                                    |
| NPH in published work                                                                                                    | High<br>Low | High      | High     | eq       | MD histogram analysis able to distinguish NPH from neurodegenerative disorders including Alzheimer's and Parkinson's diseases with 86% sensitivity and 96% specificity | MD alone is inadequate to characterize complex post-operative changes; reduction has been demonstrated with external lumbar drainage, yet MD remained significantly different in patients vs. controls two weeks following shunting.                                                                                                                                                                                                                                                                                                                                        |
| NPH in this study (including proportions of change)–<br>1. Predominant transependymal diffusion with stretch/compression | Very Low    | Very High | High     | Dominant | Loss of integrity with significant compression and oedema sufficient to cause axonal disruption (GCC and BCC; adjacent to ventricles)                                  | Different patterns coexisting, dependent on proximity to the ventricles and orientation of white matter fibres within the tracts. Multifactorial probably including axonal degeneration, demyelination, small vessel disease, enlarged Virchow-Robin spaces, reversal of interstitial fluid flow, increased transependymal CSF diffusion and impaired cerebrovascular autoregulation within the white matter. The component of stretch/ compression, characterized by increased axial diffusivity and anisotropy, appears to be the most amenable to surgical intervention. |
| 2. Stretch/oedema                                                                                                        | Low         | High      | High     | High     | Loss of integrity with significant compression and oedema (ILF; lateral to ventricles)                                                                                 |                                                                                                                                                                                                                                                                                                                                                                                                                                                                                                                                                                             |
| 3. Predominant stretch/compression                                                                                       | High        | High      | Dominant | Moderate | Loss of integrity with predominant compression (PLIC; remote to ventricles)                                                                                            |                                                                                                                                                                                                                                                                                                                                                                                                                                                                                                                                                                             |

<https://doi.org/10.1371/journal.pone.0181624.t005>

coordinates were plotted in dimensionally comparable graphs, we found that differences in DTI profiles produced patterns of injury that occupied geographically distinct white matter districts (Fig 3). Furthermore, individual ROIs demonstrated differing degrees of early responsiveness to surgical intervention, suggesting that some patterns of white matter injury were more reversible than others.

### DTI findings in demyelination, degeneration, oedema, compression and displacement of white matter

How are DTI findings, consistent with measures described in our study, interpreted within the wider context of white matter injury? Table 5 presents changes seen in DTI measures observed across pathologies. To summarize, reductions in FA are reported in a broad range of conditions whereas increases in FA are more rarely observed. Increases in MD are consistent with conditions involving axonal loss, vasogenic oedema or leukoaraiosis [39–44]. Increases in

radial diffusivity occur in demyelination [39, 45]. Compression in fixed compartments, such as carpal tunnel syndrome [46, 47] and cervical spondylotic myelopathy [48, 49] reduces FA, increases MD, reduces axial diffusivity but increases radial diffusivity. Conversely, displacement around tumours results in increased FA, unchanged MD, increased axial diffusivity and decreased radial diffusivity [50]. In NPH, we found that differing and more complex patterns could be observed as compared to DTI changes demonstrated in these purer neurological entities.

## DTI interpretation in the context of hydrocephalus in general

Our demonstration of increased mean diffusivity in all six tracts examined reflects increases in both axial and radial diffusivities and confirms earlier studies. Gideon *et al.* originally reported findings of a generalised increase in brain ADC in five patients with NPH whereas Ivkovic *et al.* have suggested that MRI mean diffusivity histogram analysis is able to distinguish NPH from neurodegenerative disorders including Alzheimer's and Parkinson's diseases with 86% sensitivity and 96% specificity [12, 51]. We have shown that this increase in mean diffusivity reflects increases in both axial and radial diffusivities.

With normal ageing, there is a small increase in periventricular mean diffusivity [52]. Increases in mean diffusivity in obstructive hydrocephalus, at least in younger age-groups, are restricted to the periventricular tissues as the result of reversal of CSF flow through the ependymal lining and tend to resolve after CSF diversion [11, 53–55]. By contrast, in NPH, progressive ventriculomegaly occurs in the apparent absence of raised intracranial pressure, yet mean diffusivity changes are more widespread. The mechanism of the more generalized increase in white matter mean diffusivity in NPH is unclear but probably multifactorial, including axonal (Wallerian) degeneration, demyelination, small vessel disease, enlarged Virchow-Robin spaces, reversal of interstitial fluid flow, impairment of cerebrovascular autoregulation within the white matter, and increased transependymal diffusion of CSF. Interestingly, an increase in extracellular water *per se* may have no effect on neurological function unless it contains neurotoxic compounds [56].

## Challenges of imaging theories and mechanisms in NPH

It is clear that NPH is likely to be a balance of multiple injury elements co-existing. Neuro-radiological findings have been mechanistically diverse, spanning changes from cerebral blood flow and CSF hydrodynamics to the architecture of structural compartments and gray matter volume [57]. Whilst DTI findings in both purer neurological conditions and acute hydrocephalus are not entirely applicable to NPH in its complexity, there has been evidence in the literature of changes consistent with reproducible injury patterns, particularly in the corpus callosum and posterior limb of the internal capsule, despite the wide variability of technical specifications employed [58]. Yet, not all white matter injury is necessarily amenable to intervention. This limits potential candidate mechanisms with the ability to achieve the concept of plausible reversibility.

One proposed mechanism with apparent merit is stretch. Assaf *et al.* suggested that, in children with acute hydrocephalus, stretching of the fibres to become more linearly aligned results in fewer obstacles to diffusion [11]. Work in NPH by Hattori *et al.* demonstrates their concept elegantly [14]. This is also consistent with findings in MR elastography, that have revealed that brain tissue is softer (reduced shear elasticity) in NPH, accompanied by a decrease in microstructural connectivity [59]. Microstructural connectivity is the only parameter found to improve after shunting [8]. Why should axonal stretch result in enhanced diffusion along the direction of the axons—surely stretch should decrease the extracellular fluid space between

axons and thereby restrict diffusion? Conversely, there may also be a limit to axonal stretch beyond which microstructural gaps appear; distortion may turn into 'leakiness' resulting in increased diffusion. The concept of stretch alone is clearly insufficient to describe DTI changes found within NPH. Excess extracellular water, another candidate for plausible reversibility, would be consistent with the finding of increased mean diffusivity in this and other studies. However, on its own, oedema would also be insufficient to describe DTI changes found within NPH in their entirety. Stretch does not necessarily occur in other conditions with excess extracellular water; oedema as a sole pathological process would be contradictory to some of the DTI findings in this study. Our approach to resolving such conflict is by describing the finding of stretch in its proper context. In cases where stretch increases the linearity of axonal fibres and results in increased axial diffusivity, we prefer the term '*stretch/compression*'. Whilst stretch remains the key concept, the combination term acknowledges the contradictory possibility of decreases vs. increases of radial diffusivity, such as seen in distortion around brain tumours vs. compression in fixed neural compartments. In the context of severe distortional stretch of fibres resulting in a larger component of increased radial diffusivity, we prefer the term '*stretch/oedema*', which conveys the concept of leakiness across axons where stretch has been sufficient to result in compromised microstructure.

In imaging NPH, there is a difficult dichotomy between the apparent simplicity of features required for its diagnosis and the challenge of finding adjuncts proven to increase diagnostic accuracy of shunt-responsive NPH. Structural sequences are key to identifying significant ventriculomegaly, not entirely attributable to cerebral atrophy or congenital enlargement, and for confirming that there is no macroscopic obstruction to CSF flow [17]. However, in NPH, many other features contribute in small but meaningful ways to understanding shunt-responsiveness, such as periventricular lucency, degree of leukoaraiosis, hyperdynamic CSF flow, diameter of the corpus callosum, calculation of the callosal angle, tightness of the high convexity, perihippocampal and subarachnoid space morphology as well as changes in cerebral blood flow and perfusion [2, 5, 17, 57, 60–67]. It is difficult to reconcile the need for additional advanced correlates of disease vs. practicalities, such as time constraints, of scanning patients with dementia. Non-invasive imaging that can be acquired rapidly and methodology deliverable at lower specifications, such as part of routine clinical imaging, would greatly enhance our ability to screen for patterns potentially amenable to intervention. NPH presents as a spectrum; responsiveness of CSF shunting is imperfect as is prognostication of response. Interpretation of injury patterns cannot be readily solved by global methods alone. What would be the pathophysiological basis of white matter changes that represent a reversible pattern of injury but lack a specific histological signature? DTI is a tool capable of revealing damage to microarchitecture of axons without presupposing knowledge of the underlying mechanism of such injury. The major obstacle to a more immediate application of DTI in NPH is a transparent and reproducible method of interpretation that is both achievable within a clinical setting and yet takes into account such critical gaps in knowledge.

## DTI—From tensor ellipses to profiles

In this study, we established a basis for the interpretation of DTI changes in NPH based on set patterns involving purer pathologies, *a priori*, in order to resolve such conflicts (Table 5). By examining each ROI set for their full panel of DTI measures simultaneously, we were able to generate DTI profiles that represent both directional information, as well as proportional magnitude. It was possible to appreciate predominate patterns of injury and illustrate them in the form of radar graphs that are scalar and dimensionally comparable (Fig 2).

An increase in MD and reduction in anisotropy are shared by many disease processes [68]. Examination of FA and MD alone are insufficient to fully characterize patterns of white matter injury. It has been well described that directions of change may be underestimated by conflicting changes in individual measures [35, 69]. The interpretation of FA requires knowledge of both axial and radial diffusivity components [69]. This concept has already been established in DTI analysis, for example, the patterns of compression differ depending on context, such as displaced/ stretched fibre systems in brain tumours [50] vs. cervical spondylotic myelopathy. Simultaneous changes in both components may dilute the overall direction of change in FA. FA is mainly dependent on the change in axial diffusivity, i.e., its larger component. Modest but significant changes in radial diffusivity, its smaller component, may not impact on FA as greatly as small changes in its larger component. Conversely, a large change in radial diffusivity may unduly mask the contribution of modest changes in axial diffusivity. These considerations are well known in DTI interpretation, yet do not greatly impact the analysis of findings in conditions such as tumours or stroke, for which histological findings are described. As NPH is a disease that lacks a histopathological signature, such correlations are lacking. Corroboration of DTI findings depends on other methods, such as multi-modal imaging and responsiveness to CSF drainage. Our methodology of DTI profiling and correlation with PQ graphs, whilst seeming more laborious when compared to semi-automated methods, has the advantage of demanding consistency within DTI measures, in order to avoid such pitfalls in interpretation.

### Patterns of white matter injury in NPH pre-operatively and early changes following surgical intervention

DTI profiles revealed four main patterns of changes (three pre-operative and one post-operative) that appeared to be influenced by neuroanatomical factors. We found that both the proximity of white matter tracts to the lateral ventricles and the directional arrangement of fibre tract bundles mattered. In general terms, tracts directly adjacent to the ventricles, such as the corpus callosum, were the most affected, with significantly abnormal findings across the entire panel of DTI measures. Tracts furthest away from the ventricles, arranged in a supero-inferior fashion, such as the posterior limb of the internal capsule, were the most preserved. Fibre tracts lateral to the ventricles, running antero-posterior, demonstrated a combination of the injury elements observed in the other two patterns.

### Pre-operative changes in NPH patients compared to healthy volunteers

#### i) Predominant transependymal diffusion with the presence of stretch/compression.

The most affected white matter tracts were the genu and body of the corpus callosum that are directly adjacent to the ventricles, consistent with other studies [70, 71]. The decreases in FA and anisotropy (p, q components) were due to a large increase in radial diffusivity despite smaller increases in axial diffusivity (Figs 2 and 3). By comparison with the DTI changes of white matter injury seen in more straightforward diseases (demyelination, infarction, vasogenic oedema, leukoaraiosis, carpal tunnel syndrome, cervical myelopathy and displacement around tumours) [39–50], the increase in MD and loss of anisotropy in the tracts adjacent to the ventricles (corpus callosum) are compatible with axonal disruption (Wallerian degeneration) and reversal of CSF flow through the ependyma. This results in expansion of the extracellular space (interstitial oedema). As oedema alone would not cause increases in axial diffusivity, a smaller component of stretch/compression must exist. However, the proportional magnitude of decreased FA and increased MD strongly favour oedema as the predominant process, here specifically termed transependymal diffusion due to its location.



**ii) Stretch/oedema.** The tracts lateral to but close to the ventricles, inferior longitudinal fasciculus, demonstrated similar but less severe changes consistent with stretch/compression and increased interstitial fluid. DTI findings in the inferior fronto-occipital/uncinate fasciculi were also consistent with this profile, despite being further away from the ventricles. There is some, albeit limited, neuropathological evidence to support these interpretations [6, 72]. The impact of proximity to the ventricle may be a reflection of greater tissue distortion not only on adjacent axons but also on periventricular vasculature, leading to increase in local cerebrovascular resistance and ischaemia, with resultant watershed infarction and impairment of regional cerebrovascular autoregulation [73–75]. The anterior thalamic radiation demonstrated moderate increase in fluid, i.e. oedema, but without stretch. In this pattern, significantly increased axial diffusivity, the hallmark of compression, was lacking. DTI findings favoured increased diffusion of fluid through compromised microstructure of axons, with or without the finding of distortional stretch.

**iii) Predominant stretch/compression.** By contrast, the posterior limb of the internal capsule demonstrated the greatest increase in axial diffusivity and anisotropy (p, q components), a modest increase in MD and radial diffusivity with no reduction in FA (Figs 2 and 3). These changes in the posterior limb of the internal capsule confirm previous studies [14]. Findings are consistent with predominant displacement/stretch and a modest increase in interstitial fluid; none of the changes are sufficiently severe enough as to impact on overall FA. This pattern is the closest finding in NPH that mirrors the increases in axial diffusivity have been shown to accompany acute hydrocephalic conditions [11]. However, differences still remain; decreases in radial diffusivity have been shown to accompany acute hydrocephalus [11]. This is probably reflective of the purer nature of the condition, in which the stretch pattern of linearly aligned axons with reduced extracellular fluid spaces between them occurs due to raised intracranial pressure, a feature absent in NPH.

### Early post-operative changes at two weeks

At two weeks following surgery, it was possible to demonstrate significant changes in axial diffusivity in the posterior limb of the internal capsule. There was also a modest increase in radial diffusivity, consistent with re-expansion of extracellular fluid spaces between axons. These changes are consistent with relaxation of stretch/compression following surgical intervention. The findings preceded changes in clinical outcome; whilst the significance of such results requires further clinical correlation, they nevertheless provide evidence of changes in DTI directly attributable to the effect of surgical intervention upon white matter injury patterns. Surgery did not impact upon all three pre-operative injury patterns in the same way; the pattern of predominant stretch/compression was the most amenable to intervention. However, trends demonstrated such DTI changes following intervention could be seen for the profile of stretch/compression even if it was not predominant; changes were proportional to the magnitude of the component present pre-operatively. Conversely, other profiles progressed despite surgical intervention, implying that the absence of the profile of stretch/compression may be disadvantageous, or indeed that other profiles of white matter injury are less reversible.

### Correlation of DTI profiles to p:q tensor decomposition methodology

We further correlated the changes seen using DTI profiles with p:q methodology [35]. As described above, this visualization method, based on tensor transformation, decomposes the diffusion tensor into its isotropic (p) and anisotropic (q) components. The advantage of this technique is the possibility of simultaneous analyses of both FA and MD, as well as an additional five scalar measures. Changes in isotropy and anisotropy were concurrently graphed in

two equivalent axes to allow them to be dimensionally comparable. This allows of changes to be represented without *a priori* presumptions of predominant pathological injury. We found an increase in the isotropy of all white matter tracts as all ROIs evolved from healthy controls to pre-operative NPH patients, consistent with the interpretation of widespread axonal disruption or distortion (Fig 3). As demonstrated using DTI profiles, the degree of increase in MD and isotropy measures was dependent upon the distance from the ventricles. Changes in the corpus callosum were the most severe and indicative of axonal disruption whereas the posterior limb of the internal capsule was relatively preserved, with findings more suggestive of axonal distortion by stretch/compression. This is consistent with work using regional cerebral blood flow, the findings of which have demonstrated more congruence with distance to ventricles than functional neuroanatomical groupings [5, 66]. Anisotropy increases seen on the p:q plane in the posterior limb of the internal capsule, inferior longitudinal fasciculus and inferior fronto-occipital/uncinate fasciculi supported the interpretation of stretch/compression. In the corpus callosum and the anterior thalamic radiation, changes in isotropy predominated, consistent with increased transependymal diffusion and interstitial fluid i.e. oedema.

Two weeks post-surgical intervention, p:q changes for the genu of the corpus callosum, inferior longitudinal fasciculus and the posterior limb of the internal capsule suggested improvement in stretch/compression (Fig 3). Only two ROIs, the posterior limb of the internal capsule and inferior longitudinal fasciculus, demonstrated trajectories attempting a '*round trip*'; i.e. a return journey to normal levels of p:q diffusion characteristics. When the DTI and p:q profiles were compared to stretch curves modelling the relationship between mechanical stretch (L) and diffusion tensor parameters, the post-operative changes seen in the genu of the corpus callosum, inferior longitudinal fasciculus and the posterior limb of the internal capsule were consistent with the theoretical prediction for decompression. Strikingly, changes in DTI and p:q profiles suggested that the body of the corpus callosum apparently worsened. We hypothesize that this may simply be a 'shunt effect'. Changes in radial diffusivity and isotropy do not distinguish between inflow and outflow movements; in the early post-operative period, it is therefore not possible to distinguish between the continuing pathological process of transependymal diffusion vs. the increased flow into the ventricles due to the physiological process of CSF drainage due to shunting. This is in contrast to finite periods of continuous CSF diversion, such as external lumbar drainage, in which changes of decreased mean diffusivity could be more simply demonstrated [76]. The effects of producing different results in DTI measures in the context of differing conditions of CSF diversion, such as lumbar drainage vs. definitive shunting, reinforce the advantages of using a methodology of DTI profiles correlated to PQ graphs as this offers more consistency in the interpretation of changes across differing flow characteristics.

## Correlation with clinical features of NPH

This study demonstrates the responsiveness of differing DTI profiles of white matter injury to surgical intervention. Demonstrating changes due to intervention does not necessarily equate to demonstrating clinical improvement secondary to shunting. In fact, as is quite commonly the case clinically, patients in this study were seen to merely return to baseline at this stage, following a period of post-operative functional recovery. It is for this reason that post-operative clinical outcome assessment, involving the use of NPH outcome scoring, is usually recommended only at 3-, 6- and 12-months following surgery [16]. Outcome measurements beyond one year are heavily influenced by the presence of comorbidities in the ageing cohort whilst scoring prior to 3-months is confounded by multiple factors, such as the need for post-operative functional optimization, shunt valve setting adjustment and the presence of subdural fluid

collections of uncertain significance, amongst other considerations. However, despite such qualifications, the study does demonstrate the effect of surgical intervention on patterns of white matter injury prior to changes in clinical function. Such a baseline is important to establish; published studies have either focused on enhancing tools for the differential diagnosis of NPH vs. neurodegenerative conditions or correlating the effect of shunting with clinical outcome groups. What is the tissue signature compatible with reversible injury and what is the effect of CSF drainage on such patterns? This study seeks to contribute to the understanding gap that exists between the pathophysiological evolution of NPH and the degree of responsiveness of pathological processes to intervention.

Pre-operative DTI profiles offered insights into the differing white matter injury patterns found in NPH. Paradoxically, despite the pre-operative DTI evidence of stretching in the posterior limb of the internal capsule, the gait disturbance of NPH is not accompanied by any signs of a pyramidal disturbance and there are only subtle effects on hand function. Central motor conduction is unaffected in NPH. Despite the widespread DTI changes in the corpus callosum, there is no evidence, except for two case reports, of neuropsychological features of a callosal disconnection syndrome. The cognitive profile of NPH is subcortical in nature; this may be consistent with the subtle white matter injury patterns seen. There are published reports of changes in volume of relevant structures, including the hippocampus and fornix, as well as the caudate nucleus, but the mechanisms of these changes are unclear [77, 78]. Although our results demonstrated congruence with DTI findings from a spectrum of hydrocephalic disorders, the severity and extent of axonal distortion demonstrated by our findings are disproportionate to increases in MD predicted by work in normal aging, paediatric and obstructive hydrocephalus [51, 52, 79]. It appears that the pathophysiology of NPH is distinct from other related conditions.

## Limitations

The study presents a dataset acquired using modest DTI specifications. This is consistent with other published studies in literature demonstrating similar findings [11, 12, 14, 71, 80–82] and reflects the specific challenges of imaging this patient population. Valve implants present further challenges in the post-operative phase, with the blooming artefact associated with magnetic valves possibly worse at higher resolutions. There are also other considerations of scanning at higher specifications; a recent safety advisory has recently been issued against a valve in extensive clinical use, declaring a previously unknown additional safety risk of scanning using the MR-compatible valve, but only at 3-Tesla. As patients with NPH who undergo surgical intervention serve as their own controls, a further consideration is the issue of repeatability of DTI acquisition between imaging sessions. However, data from in-house studies using the same MR system, sequences and radiographic staff in healthy subjects aged 25–44 years have demonstrated that variability in reproducibility data from within and between sessions was lower than the values for inter-subject variability [83]. Standard thresholds for changes in DTI parameters are not yet available despite many methodological studies. Nevertheless, further work is underway to produce reference data using specific predetermined DTI thresholds for future comparisons in NPH patients and age-matched healthy controls.

The degree of ventriculomegaly also differs greatly between patients in NPH, resulting in technical difficulties in generating accurate data from various white matter quantification techniques that rely on computer-generated masks and normalized brain templates, such as Tract-Based Spatial Statistics (TBSS) and Voxel-Based Morphometry (VBM). In addition, the DTI model needs to be sufficiently subtle such that it is possible to observe differences for ROIs selected *a priori* in patients pre- and post-surgical intervention, that would also allow

comparisons of patients against themselves as controls. The results indicate that the DTI methodology using ROIs is able to demonstrate white matter injury in NPH patients compared to healthy controls. ROIs were chosen to minimise the well-known problems posed by crossing fibres and CSF contamination [68, 84]. Such manual methods are not without their drawbacks but the advantages of ROI methodology are both its accessibility and clinical familiarity with its use. In this study, we have confirmed that high intra- and inter-rater reliability is possible using strict neuroanatomical landmarks. The participant groups could also be criticized for being small; however, such numbers have proven adequate to demonstrate significant differences between patients (pre-operative and post-operative) and healthy controls. In the case of mean diffusivity, 15 patients were sufficient for sensitivity/specificity analysis [12]. Our findings of responsiveness of white matter injury patterns to intervention need to be confirmed with clinical outcome. Yet, our demonstration of pure DTI changes due to shunting, that preceded changes in clinical symptomatology, forms a useful baseline in assessing the degree of differences required to effect meaningful improvement in patients with this condition.

## Conclusions

Few, if any, neurological disorders in elderly patients have demonstrated improvement to the levels of 60–80% with intervention as reported in NPH [85]. Methods to define a potentially remediable hydrocephalic component in the individual patient remain controversial. Novel, yet minimalistic imaging strategies that are readily translatable to immediate clinical use would be urgent priorities. DTI profiling and p:q correlation to characterize patterns of white matter injury may contribute a non-invasive biomarker of potentially reversible white matter injury and risk-stratification for surgery particularly in patients whose clinical phenotype overlaps with other neurodegenerative diseases. Future work to corroborate patterns with discrete clinical outcome groups, neurodegenerative diseases, other forms of acute-on-chronic hydrocephalus, as well as overlay of significant comorbidities, would be invaluable.

## Acknowledgments

The authors would like to thank Professor Jonathan Gillard, Department of Radiology, Addenbrooke's Hospital, for his role in contributing to the initial study design, discussions on imaging techniques and supervision of the work. We would also like to acknowledge Professor Peter Hutchinson, Department of Neurosurgery, Addenbrooke's Hospital, for his contribution as independent neurosurgeon for recruitment of study participants, as well as Professor David Menon, Dr Virginia Newcombe and Dr Guy Williams for advice in DTI processing and analysis. We would also like to thank the staff of the Wolfson Brain Imaging Centre for their hard work and support during the study, in particular, Supervising Radiographer Vicky Lupson, all the patients and their families for their generosity of time and enthusiasm in contributing to the study. We would also like to thank Shawn Tan, Department of Radiology, Singapore General Hospital, Singapore, for his work in contributing independent ROI analysis on the training dataset for the inter-rater reliability and Janell Kwok, Department of Neurosurgery, National Neuroscience Institute, Singapore, for her contribution to supporting administrative matters for ongoing work.

## Author Contributions

**Conceptualization:** Nicole C. Keong, Stephen J. Price, Marek Czosnyka, Zofia Czosnyka, Elise E. DeVito, Barbara J. Sahakian, John D. Pickard.

**Data curation:** Nicole C. Keong, Alonso Pena, Stephen J. Price, Marek Czosnyka, Zofia Czosnyka, Elise E. DeVito, Charlotte R. Housden, Barbara J. Sahakian, John D. Pickard.

**Formal analysis:** Nicole C. Keong, Alonso Pena, Stephen J. Price, Marek Czosnyka, Zofia Czosnyka, Elise E. DeVito, Charlotte R. Housden, Barbara J. Sahakian, John D. Pickard.

**Funding acquisition:** Nicole C. Keong, John D. Pickard.

**Investigation:** Nicole C. Keong, Marek Czosnyka, Zofia Czosnyka, Elise E. DeVito, Charlotte R. Housden, Barbara J. Sahakian, John D. Pickard.

**Methodology:** Nicole C. Keong, Alonso Pena, Stephen J. Price, Marek Czosnyka, Zofia Czosnyka, Elise E. DeVito, Charlotte R. Housden, Barbara J. Sahakian, John D. Pickard.

**Project administration:** Nicole C. Keong, Elise E. DeVito, Charlotte R. Housden.

**Resources:** Nicole C. Keong.

**Software:** Nicole C. Keong.

**Supervision:** Nicole C. Keong, Stephen J. Price, Barbara J. Sahakian, John D. Pickard.

**Validation:** Nicole C. Keong.

**Visualization:** Nicole C. Keong, Alonso Pena.

**Writing – original draft:** Nicole C. Keong, Alonso Pena, Stephen J. Price, Marek Czosnyka, Zofia Czosnyka, Barbara J. Sahakian, John D. Pickard.

**Writing – review & editing:** Nicole C. Keong, Alonso Pena, Stephen J. Price, Marek Czosnyka, Zofia Czosnyka, John D. Pickard.

## References

1. Adams RD, Fisher CM, Hakim S, Ojemann RG, Sweet WH. Symptomatic Occult Hydrocephalus with "Normal" Cerebrospinal-Fluid Pressure. A Treatable Syndrome. *The New England journal of medicine*. 1965; 273:117–26. <https://doi.org/10.1056/NEJM196507152730301> PMID: 14303656.
2. Juss J, Keong N, Forsyth D, Pickard J. Normal pressure hydrocephalus. *CME Journal Geriatric Medicine*. 2008; 10(2):62–7.
3. Factora R. When do common symptoms indicate normal pressure hydrocephalus? *Cleveland Clinic journal of medicine*. 2006; 73(5):447–50, 52, 55–6 passim. PMID: 16708712.
4. Bech RA, Juhler M, Waldemar G, Klinken L, Gjerris F. Frontal brain and leptomeningeal biopsy specimens correlated with cerebrospinal fluid outflow resistance and B-wave activity in patients suspected of normal-pressure hydrocephalus. *Neurosurgery*. 1997; 40(3):497–502. PMID: 9055288.
5. Momjian S, Owler BK, Czosnyka Z, Czosnyka M, Pena A, Pickard JD. Pattern of white matter regional cerebral blood flow and autoregulation in normal pressure hydrocephalus. *Brain: a journal of neurology*. 2004; 127(Pt 5):965–72. <https://doi.org/10.1093/brain/awh131> PMID: 15033897.
6. Leinonen V, Koivisto AM, Savolainen S, Rummukainen J, Sutela A, Vanninen R, et al. Post-mortem findings in 10 patients with presumed normal-pressure hydrocephalus and review of the literature. *Neuropathology and applied neurobiology*. 2012; 38(1):72–86. <https://doi.org/10.1111/j.1365-2990.2011.01195.x> PMID: 21696417.
7. Yakovlev PI. Telencephalon "impar", "semipar" and "totopar". (Morphogenetic, tectogenetic and architectonic definitions). *International journal of neurology*. 1968; 6(3–4):245–65. PMID: 5759636.
8. Freimann FB, Streitberger KJ, Klatt D, Lin K, McLaughlin J, Braun J, et al. Alteration of brain viscoelasticity after shunt treatment in normal pressure hydrocephalus. *Neuroradiology*. 2012; 54(3):189–96. <https://doi.org/10.1007/s00234-011-0871-1> PMID: 21538046.
9. Sidaros A, Engberg AW, Sidaros K, Liptrot MG, Herning M, Petersen P, et al. Diffusion tensor imaging during recovery from severe traumatic brain injury and relation to clinical outcome: a longitudinal study. *Brain: a journal of neurology*. 2008; 131(Pt 2):559–72. <https://doi.org/10.1093/brain/awm294> PMID: 18083753.

10. Newcombe VF, Williams GB, Nortje J, Bradley PG, Harding SG, Smielewski P, et al. Analysis of acute traumatic axonal injury using diffusion tensor imaging. *British journal of neurosurgery*. 2007; 21(4):340–8. <https://doi.org/10.1080/02688690701400882> PMID: 17676452.
11. Assaf Y, Ben-Sira L, Constantini S, Chang LC, Beni-Adani L. Diffusion tensor imaging in hydrocephalus: initial experience. *AJNR American journal of neuroradiology*. 2006; 27(8):1717–24. PMID: 16971621.
12. Ivkovic M, Liu B, Ahmed F, Moore D, Huang C, Raj A, et al. Differential diagnosis of normal pressure hydrocephalus by MRI mean diffusivity histogram analysis. *AJNR American journal of neuroradiology*. 2013; 34(6):1168–74. <https://doi.org/10.3174/ajnr.A3368> PMID: 23257611.
13. Nagesh V, Tsien CI, Chenevert TL, Ross BD, Lawrence TS, Junick L, et al. Radiation-induced changes in normal-appearing white matter in patients with cerebral tumors: a diffusion tensor imaging study. *International journal of radiation oncology, biology, physics*. 2008; 70(4):1002–10. <https://doi.org/10.1016/j.ijrobp.2007.08.020> PMID: 18313524;
14. Hattori T, Yuasa T, Aoki S, Sato R, Sawaura H, Mori T, et al. Altered microstructure in corticospinal tract in idiopathic normal pressure hydrocephalus: comparison with Alzheimer disease and Parkinson disease with dementia. *AJNR American journal of neuroradiology*. 2011; 32(9):1681–7. <https://doi.org/10.3174/ajnr.A2570> PMID: 21816921.
15. Keong NC, Price SJ, Gillard JH, Pickard JD. DTI profiles in NPH. *British journal of neurosurgery*. 2012; October, 26(5):600.
16. Klinge P, Marmarou A, Bergsneider M, Relkin N, Black PM. Outcome of shunting in idiopathic normal-pressure hydrocephalus and the value of outcome assessment in shunted patients. *Neurosurgery*. 2005; 57(3 Suppl):S40–52; discussion ii-v. PMID: 16160428.
17. Relkin N, Marmarou A, Klinge P, Bergsneider M, Black PM. Diagnosing idiopathic normal-pressure hydrocephalus. *Neurosurgery*. 2005; 57(3 Suppl):S4–16; discussion ii-v. PMID: 16160425.
18. Keong NC, Czosnyka M, Czosynka Z, Pickard JD. Chapter 34 Clinical Evaluation of Adult Hydrocephalus. In: Winn R, editor. *Youmans Neurological Surgery*. Sixth Edition ed. Philadelphia, United States of America: Saunders; 2011.
19. Marmarou A, Bergsneider M, Klinge P, Relkin N, Black PM. The value of supplemental prognostic tests for the preoperative assessment of idiopathic normal-pressure hydrocephalus. *Neurosurgery*. 2005; 57(3 Suppl):S17–28; discussion ii-v. PMID: 16160426.
20. Weerakkody RA, Czosnyka M, Schuhmann MU, Schmidt E, Keong N, Santarius T, et al. Clinical assessment of cerebrospinal fluid dynamics in hydrocephalus. Guide to interpretation based on observational study. *Acta Neurol Scand*. 2011; 124(2):85–98. <https://doi.org/10.1111/j.1600-0404.2010.01467.x> PMID: 21208195.
21. Shapiro AM, Benedict RH, Schretlen D, Brandt J. Construct and concurrent validity of the Hopkins Verbal Learning Test-revised. *The Clinical neuropsychologist*. 1999; 13(3):348–58. <https://doi.org/10.1076/clin.13.3.348.1749> PMID: 10726605.
22. Folstein MF, Folstein SE, McHugh PR. "Mini-mental state". A practical method for grading the cognitive state of patients for the clinician. *Journal of psychiatric research*. 1975; 12(3):189–98. PMID: 1202204.
23. Benton AL. Neuropsychological assessment. *Annual review of psychology*. 1994; 45:1–23. <https://doi.org/10.1146/annurev.ps.45.020194.000245> PMID: 8135502.
24. Iddon JL, Pickard JD, Cross JJ, Griffiths PD, Czosnyka M, Sahakian BJ. Specific patterns of cognitive impairment in patients with idiopathic normal pressure hydrocephalus and Alzheimer's disease: a pilot study. *Journal of neurology, neurosurgery, and psychiatry*. 1999; 67(6):723–32. PMID: 10567486;
25. Devito EE, Pickard JD, Salmond CH, Iddon JL, Loveday C, Sahakian BJ. The neuropsychology of normal pressure hydrocephalus (NPH). *British journal of neurosurgery*. 2005; 19(3):217–24. <https://doi.org/10.1080/02688690500201838> PMID: 16455521.
26. Woolrich MW, Jbabdi S, Patenaude B, Chappell M, Makni S, Behrens T, et al. Bayesian analysis of neuroimaging data in FSL. *NeuroImage*. 2009; 45(1 Suppl):S173–86. <https://doi.org/10.1016/j.neuroimage.2008.10.055> PMID: 19059349.
27. Smith SM, Jenkinson M, Woolrich MW, Beckmann CF, Behrens TE, Johansen-Berg H, et al. Advances in functional and structural MR image analysis and implementation as FSL. *NeuroImage*. 2004; 23 Suppl 1:S208–19. <https://doi.org/10.1016/j.neuroimage.2004.07.051> PMID: 15501092.
28. Basser PJ, Pierpaoli C. Microstructural and physiological features of tissues elucidated by quantitative-diffusion-tensor MRI. *Journal of magnetic resonance Series B*. 1996; 111(3):209–19. PMID: 8661285.
29. Basser PJ. Inferring microstructural features and the physiological state of tissues from diffusion-weighted images. *NMR in biomedicine*. 1995; 8(7–8):333–44. PMID: 8739270.
30. London UC. SPM5 2005 [Dec 2005]. <http://www.fil.ion.ucl.ac.uk/spm/>.
31. Oishi K, Faria A, vanZijl P, Mori S. *MRI Atlas of Human White Matter*. second edition ed. UK: Elsevier B.V.; 2011.

32. Rasband W. Research Services Branch of the National Institute of Mental Health N. Institutes of Health (NIH) B, Maryland, USA. ImageJ.
33. Soares JM, Marques P, Alves V, Sousa N. A hitchhiker's guide to diffusion tensor imaging. *Front Neurosci*. 2013; 7:31. <https://doi.org/10.3389/fnins.2013.00031> PMID: 23486659;
34. Leemans A JB, Sijbers J, Jones DK. "ExploreDTI: A graphical toolbox for processing, analyzing, and visualizing diffusion MR data". Proceedings of the 17th Scientific Meeting, International Society for Magnetic Resonance in Medicine, Honolulu, USA, p. 3537, 2009.
35. Pena A, Green HA, Carpenter TA, Price SJ, Pickard JD, Gillard JH. Enhanced visualization and quantification of magnetic resonance diffusion tensor imaging using the p:q tensor decomposition. *The British journal of radiology*. 2006; 79(938):101–9. <https://doi.org/10.1259/bjr/24908512> PMID: 16489190.
36. Pierpaoli C, Jezzard P, Basser PJ, Barnett A, Di Chiro G. Diffusion tensor MR imaging of the human brain. *Radiology*. 1996; 201(3):637–48. <https://doi.org/10.1148/radiology.201.3.8939209> PMID: 8939209.
37. Srinivasan K, Thomas B, Shah D, Kannath SK, Menon G, Sandhyamani S, et al. Quantification of diffusion and anisotropy in intracranial epidermoids using diffusion tensor metrics and p: q tensor decomposition. *Journal of neuroradiology Journal de neuroradiologie*. 2016; 43(6):363–70. <https://doi.org/10.1016/j.neurad.2016.02.003> PMID: 27318387.
38. Ateshian GA, Weiss JA. Anisotropic hydraulic permeability under finite deformation. *Journal of biomechanical engineering*. 2010; 132(11):111004. <https://doi.org/10.1115/1.4002588> PMID: 21034145;
39. Song SK, Sun SW, Ju WK, Lin SJ, Cross AH, Neufeld AH. Diffusion tensor imaging detects and differentiates axon and myelin degeneration in mouse optic nerve after retinal ischemia. *NeuroImage*. 2003; 20(3):1714–22. PMID: 14642481.
40. Sun SW, Liang HF, Cross AH, Song SK. Evolving Wallerian degeneration after transient retinal ischemia in mice characterized by diffusion tensor imaging. *NeuroImage*. 2008; 40(1):1–10. <https://doi.org/10.1016/j.neuroimage.2007.11.049> PMID: 18187343;
41. Thomalla G, Glauche V, Weiller C, Rother J. Time course of wallerian degeneration after ischaemic stroke revealed by diffusion tensor imaging. *Journal of neurology, neurosurgery, and psychiatry*. 2005; 76(2):266–8. <https://doi.org/10.1136/jnnp.2004.046375> PMID: 15654048;
42. Werring DJ, Toosy AT, Clark CA, Parker GJ, Barker GJ, Miller DH, et al. Diffusion tensor imaging can detect and quantify corticospinal tract degeneration after stroke. *Journal of neurology, neurosurgery, and psychiatry*. 2000; 69(2):269–72. <https://doi.org/10.1136/jnnp.69.2.269> PMID: 10896709;
43. Assaf Y, Pasternak O. Diffusion tensor imaging (DTI)-based white matter mapping in brain research: a review. *Journal of molecular neuroscience: MN*. 2008; 34(1):51–61. <https://doi.org/10.1007/s12031-007-0029-0> PMID: 18157658.
44. Nitkunan A, Charlton RA, McIntyre DJ, Barrick TR, Howe FA, Markus HS. Diffusion tensor imaging and MR spectroscopy in hypertension and presumed cerebral small vessel disease. *Magnetic resonance in medicine*. 2008; 59(3):528–34. <https://doi.org/10.1002/mrm.21461> PMID: 18224697.
45. Song SK, Sun SW, Ramsbottom MJ, Chang C, Russell J, Cross AH. Dysmyelination revealed through MRI as increased radial (but unchanged axial) diffusion of water. *NeuroImage*. 2002; 17(3):1429–36. PMID: 12414282.
46. Stein D, Neufeld A, Pasternak O, Graif M, Patish H, Schwimmer E, et al. Diffusion tensor imaging of the median nerve in healthy and carpal tunnel syndrome subjects. *Journal of magnetic resonance imaging: JMRI*. 2009; 29(3):657–62. <https://doi.org/10.1002/jmri.21553> PMID: 19243048.
47. Brienza M, Pujia F, Colaiacomo MC, Anastasio MG, Pierelli F, Di Biasi C, et al. 3T diffusion tensor imaging and electroneurography of peripheral nerve: a morphofunctional analysis in carpal tunnel syndrome. *Journal of neuroradiology Journal de neuroradiologie*. 2014; 41(2):124–30. <https://doi.org/10.1016/j.neurad.2013.06.001> PMID: 23870213.
48. Uda T, Takami T, Tsuyuguchi N, Sakamoto S, Yamagata T, Ikeda H, et al. Assessment of cervical spondylotic myelopathy using diffusion tensor magnetic resonance imaging parameter at 3.0 tesla. *Spine*. 2013; 38(5):407–14. <https://doi.org/10.1097/BRS.0b013e31826f25a3> PMID: 22914703.
49. Ellingson BM, Salamon N, Grinstead JW, Holly LT. Diffusion tensor imaging predicts functional impairment in mild-to-moderate cervical spondylotic myelopathy. *The spine journal: official journal of the North American Spine Society*. 2014; 14(11):2589–97. <https://doi.org/10.1016/j.spinee.2014.02.027> PMID: 24561036;
50. Schonberg T, Pianka P, Hendler T, Pasternak O, Assaf Y. Characterization of displaced white matter by brain tumors using combined DTI and fMRI. *NeuroImage*. 2006; 30(4):1100–11. <https://doi.org/10.1016/j.neuroimage.2005.11.015> PMID: 16427322.
51. Gideon P, Thomsen C, Gjerris F, Sorensen PS, Henriksen O. Increased self-diffusion of brain water in hydrocephalus measured by MR imaging. *Acta radiologica*. 1994; 35(6):514–9. PMID: 7946670.

52. Chun T, Filippi CG, Zimmerman RD, Ulug AM. Diffusion changes in the aging human brain. *AJNR American journal of neuroradiology*. 2000; 21(6):1078–83. PMID: [10871018](#).
53. Ulug AM, Truong TN, Filippi CG, Chun T, Lee JK, Yang C, et al. Diffusion imaging in obstructive hydrocephalus. *AJNR American journal of neuroradiology*. 2003; 24(6):1171–6. PMID: [12812949](#).
54. Yuan W, Mangano FT, Air EL, Holland SK, Jones BV, Altaye M, et al. Anisotropic diffusion properties in infants with hydrocephalus: a diffusion tensor imaging study. *AJNR American journal of neuroradiology*. 2009; 30(9):1792–8. <https://doi.org/10.3174/ajnr.A1663> PMID: [19661167](#).
55. Leliefeld PH, Gooskens RH, Braun KP, Ramos LM, Uiterwaal CS, Regli LP, et al. Longitudinal diffusion-weighted imaging in infants with hydrocephalus: decrease in tissue water diffusion after cerebrospinal fluid diversion. *Journal of neurosurgery Pediatrics*. 2009; 4(1):56–63. <https://doi.org/10.3171/2009.3.PEDS08337> PMID: [19569912](#).
56. Whittle IR, Piper IR, Miller JD. The contribution of secondary mediators to the etiology and pathophysiology of brain oedema: studies using a feline infusion oedema model. *Acta Neurochir Suppl (Wien)*. 1990; 51:71–3. PMID: [2128586](#).
57. Keong NC, Pena A, Price SJ, Czosnyka M, Czosnyka Z, Pickard JD. Imaging normal pressure hydrocephalus: theories, techniques, and challenges. *Neurosurg Focus*. 2016; 41(3):E11. <https://doi.org/10.3171/2016.7.FOCUS16194> PMID: [27581307](#).
58. Hoza D, Vlasak A, Horinek D, Sames M, Alfieri A. DTI-MRI biomarkers in the search for normal pressure hydrocephalus aetiology: a review. *Neurosurg Rev*. 2015; 38(2):239–44; discussion 44. <https://doi.org/10.1007/s10143-014-0584-0> PMID: [25345377](#).
59. Streitberger KJ, Wiener E, Hoffmann J, Freimann FB, Klatt D, Braun J, et al. In vivo viscoelastic properties of the brain in normal pressure hydrocephalus. *NMR in biomedicine*. 2011; 24(4):385–92. <https://doi.org/10.1002/nbm.1602> PMID: [20931563](#).
60. Kazui H, Miyajima M, Mori E, Ishikawa M, Investigators S-. Lumboperitoneal shunt surgery for idiopathic normal pressure hydrocephalus (SINPHONI-2): an open-label randomised trial. *Lancet Neurol*. 2015; 14(6):585–94. [https://doi.org/10.1016/S1474-4422\(15\)00046-0](https://doi.org/10.1016/S1474-4422(15)00046-0) PMID: [25934242](#).
61. Sasaki M, Honda S, Yuasa T, Iwamura A, Shibata E, Ohba H. Narrow CSF space at high convexity and high midline areas in idiopathic normal pressure hydrocephalus detected by axial and coronal MRI. *Neuroradiology*. 2008; 50(2):117–22. <https://doi.org/10.1007/s00234-007-0318-x> PMID: [17992524](#).
62. Holodny AI, Waxman R, George AE, Rusinek H, Kalnin AJ, de Leon M. MR differential diagnosis of normal-pressure hydrocephalus and Alzheimer disease: significance of perihippocampal fissures. *AJNR American journal of neuroradiology*. 1998; 19(5):813–9. PMID: [9613493](#).
63. Kitagaki H, Mori E, Ishii K, Yamaji S, Hirono N, Imamura T. CSF spaces in idiopathic normal pressure hydrocephalus: morphology and volumetry. *AJNR American journal of neuroradiology*. 1998; 19(7):1277–84. PMID: [9726467](#).
64. Klinge PM, Brooks DJ, Samii A, Weckesser E, van den Hoff J, Fricke H, et al. Correlates of local cerebral blood flow (CBF) in normal pressure hydrocephalus patients before and after shunting—A retrospective analysis of [(15)O]H(2)O PET-CBF studies in 65 patients. *Clin Neurol Neurosurg*. 2008; 110(4):369–75. <https://doi.org/10.1016/j.clineuro.2007.12.019> PMID: [18262344](#).
65. Palm WM, Walchenbach R, Bruinsma B, Admiraal-Behloul F, Middelkoop HA, Launer LJ, et al. Intracranial compartment volumes in normal pressure hydrocephalus: volumetric assessment versus outcome. *AJNR American journal of neuroradiology*. 2006; 27(1):76–9. PMID: [16418361](#).
66. Owler BK, Pena A, Momjian S, Czosnyka Z, Czosnyka M, Harris NG, et al. Changes in cerebral blood flow during cerebrospinal fluid pressure manipulation in patients with normal pressure hydrocephalus: a methodological study. *Journal of cerebral blood flow and metabolism: official journal of the International Society of Cerebral Blood Flow and Metabolism*. 2004; 24(5):579–87. <https://doi.org/10.1097/00004647-200405000-00012> PMID: [15129190](#).
67. Baledent O, Gondry-Jouet C, Meyer ME, De Marco G, Le Gars D, Henry-Feugeas MC, et al. Relationship between cerebrospinal fluid and blood dynamics in healthy volunteers and patients with communicating hydrocephalus. *Invest Radiol*. 2004; 39(1):45–55. <https://doi.org/10.1097/01.rii.0000100892.87214.49> PMID: [14701988](#).
68. Alexander AL, Lee JE, Lazar M, Field AS. Diffusion tensor imaging of the brain. *Neurotherapeutics: the journal of the American Society for Experimental NeuroTherapeutics*. 2007; 4(3):316–29. <https://doi.org/10.1016/j.nurt.2007.05.011> PMID: [17599699](#);
69. Green HA, Pena A, Price CJ, Warburton EA, Pickard JD, Carpenter TA, et al. Increased anisotropy in acute stroke: a possible explanation. *Stroke; a journal of cerebral circulation*. 2002; 33(6):1517–21. PMID: [12052984](#).
70. Kanno S, Abe N, Saito M, Takagi M, Nishio Y, Hayashi A, et al. White matter involvement in idiopathic normal pressure hydrocephalus: a voxel-based diffusion tensor imaging study. *J Neurol*. 2011; 258(11):1949–57. <https://doi.org/10.1007/s00415-011-6038-5> PMID: [21512742](#).



71. Hattori T, Ito K, Aoki S, Yuasa T, Sato R, Ishikawa M, et al. White matter alteration in idiopathic normal pressure hydrocephalus: tract-based spatial statistics study. *AJNR American journal of neuroradiology*. 2012; 33(1):97–103. <https://doi.org/10.3174/ajnr.A2706> PMID: 22016412.
72. Del Bigio MR, Deck JH, Davidson GS. Glial swelling with eosinophilia in human post-mortem brains: a change indicative of plasma extravasation. *Acta Neuropathol*. 2000; 100(6):688–94. PMID: 11078221.
73. Greitz T. Effect of brain distension on cerebral circulation. *Lancet*. 1969; 1(7600):863–5. PMID: 4180525.
74. Hakim S, Venegas JG, Burton JD. The physics of the cranial cavity, hydrocephalus and normal pressure hydrocephalus: mechanical interpretation and mathematical model. *Surg Neurol*. 1976; 5(3):187–210. PMID: 1257894.
75. Akai K, Uchigasaki S, Tanaka U, Komatsu A. Normal pressure hydrocephalus. Neuropathological study. *Acta Pathol Jpn*. 1987; 37(1):97–110. PMID: 3577765.
76. Ivkovic M, Reiss-Zimmermann M, Katzen H, Preuss M, Kovanlikaya I, Heier L, et al. MRI assessment of the effects of acetazolamide and external lumbar drainage in idiopathic Normal Pressure Hydrocephalus. *Fluids and barriers of the CNS*. 2015; 12(1):9. <https://doi.org/10.1186/s12987-015-0004-z> PMID: 25928394;
77. Peterson KA, Housden CR, Killikelly C, DeVito EE, Keong NC, Savulich G, et al. Apathy, ventriculomegaly and neurocognitive improvement following shunt surgery in normal pressure hydrocephalus. *British journal of neurosurgery*. 2015:1–5. <https://doi.org/10.3109/02688697.2015.1029429> PMID: 25968325.
78. DeVito EE, Salmund CH, Owler BK, Sahakian BJ, Pickard JD. Caudate structural abnormalities in idiopathic normal pressure hydrocephalus. *Acta Neurol Scand*. 2007; 116(5):328–32. <https://doi.org/10.1111/j.1600-0404.2007.00906.x> PMID: 17922726.
79. Ben-Sira L, Goder N, Bassan H, Lifshits S, Assaf Y, Constantini S. Clinical benefits of diffusion tensor imaging in hydrocephalus. *Journal of neurosurgery Pediatrics*. 2015:1–8. <https://doi.org/10.3171/2014.10.PEDS13668> PMID: 25978534.
80. Hattingen E, Jurcoane A, Melber J, Blasel S, Zanella FE, Neumann-Haefelin T, et al. Diffusion tensor imaging in patients with adult chronic idiopathic hydrocephalus. *Neurosurgery*. 2010; 66(5):917–24. <https://doi.org/10.1227/01.NEU.0000367801.35654.EC> PMID: 20404696.
81. Lenfeldt N, Larsson A, Nyberg L, Birgander R, Eklund A, Malm J. Diffusion tensor imaging reveals supplementary lesions to frontal white matter in idiopathic normal pressure hydrocephalus. *Neurosurgery*. 2011; 68(6):1586–93; discussion 93. <https://doi.org/10.1227/NEU.0b013e31820f3401> PMID: 21336219.
82. Ben-Sira L, Goder N, Bassan H, Lifshits S, Assaf Y, Constantini S. Clinical benefits of diffusion tensor imaging in hydrocephalus. *Journal of neurosurgery Pediatrics*. 2015; 16(2):195–202. <https://doi.org/10.3171/2014.10.PEDS13668> PMID: 25978534.
83. Veenith TV, Carter E, Grossac J, Newcombe VF, Outtrim JG, Lupson V, et al. Inter subject variability and reproducibility of diffusion tensor imaging within and between different imaging sessions. *PLoS One*. 2013; 8(6):e65941. <https://doi.org/10.1371/journal.pone.0065941> PMID: 23840380;
84. Jones DK, Cercignani M. Twenty-five pitfalls in the analysis of diffusion MRI data. *NMR in biomedicine*. 2010; 23(7):803–20. <https://doi.org/10.1002/nbm.1543> PMID: 20886566.
85. Malm J. Improving research and care for patients with idiopathic NPH. *Lancet Neurol*. 2015; 14(6):561–3. [https://doi.org/10.1016/S1474-4422\(15\)00055-1](https://doi.org/10.1016/S1474-4422(15)00055-1) PMID: 25934243.
